# Supplementary material for: Complete Genome Characterization of Reticuloendotheliosis Virus Detected in Chickens with Multiple Viral Coinfections
Source: MDPI journal article supplement (doi:10.3390/v14040798), 2022-04-13
Supplement: s1 [file s1]

Supplementary data

# Complete Genome Characterization of REV Detected in Chickens with Multiple Viral Coinfections

Ruy D. Chacón<sup>1,2</sup>, Benjy Sedano-Herrera<sup>3,4</sup>, Elizabeth Regina Alfaro-Espinoza<sup>5</sup>, Wilma Ursula Quispe Rojas<sup>6</sup>, Arturo Liñan-Torres<sup>7</sup>, David De la Torre<sup>1</sup>, Anderson Bento de Oliveira<sup>1</sup>, Claudete S. Astolfi-Ferreira<sup>1</sup>, and Antonio J. Piantino Ferreira<sup>1,\*</sup>

- <sup>1</sup> Department of Pathology, School of Veterinary Medicine, University of São Paulo, Av. Prof. Orlando M. Paiva, 87, CEP 05508-270, São Paulo, Brazil; [ruychaconv@usp.br](mailto:ruychaconv@usp.br) (R.D.C.); [daviddelatorreduque@gmail.com](mailto:daviddelatorreduque@gmail.com) (D.D.T.); [aoliveira@usp.br](mailto:aoliveira@usp.br) (A.B.O.); [csastolfi@gmail.com](mailto:csastolfi@gmail.com) (C.S.A.-F.); [ajpferr@usp.br](mailto:ajpferr@usp.br) (A.J.P.F.);
  - <sup>2</sup> Inter-units Program in Biotechnology, University of São Paulo, Av. Prof. Dr. Orlando M. Paiva, 87, CEP 05508-270, São Paulo, Brazil;
  - <sup>3</sup> Departamento de Ecología, Museo de Historia Natural de la Universidad Nacional Mayor de San Marcos, Lima, 15072, Perú; [benjy.sedano@unmsm.edu.pe](mailto:benjy.sedano@unmsm.edu.pe) (B.S.-H.);
  - <sup>4</sup> Asociación Peruana de Astrobiología-ASPAST, Lima, Perú;
  - <sup>5</sup> Programa de Pós-Graduação em Bioinformática, Instituto de Ciências Biológicas, Universidade Federal de Minas Gerais, Belo Horizonte, Brazil; [elizaespinoza@ufmg.br](mailto:elizaespinoza@ufmg.br) (E.R.A.-E.);
  - <sup>6</sup> Laboratory of Molecular Microbiology and Biotechnology, Faculty of Biological sciences, Universidad Nacional Mayor de San Marcos, Lima, Perú; [wilma.quispe@unmsm.edu.pe](mailto:wilma.quispe@unmsm.edu.pe) (W.U.Q.R.);
  - <sup>7</sup> Instituto de Biotecnología. Universidad Nacional Autónoma de México. Av. Universidad 2001 Col. Chamilpa, Cuernavaca, Morelos, 62210, México; [arturo.linan@ibt.unam.mx](mailto:arturo.linan@ibt.unam.mx) (A.L.-T.);
- \* Correspondence: [ajpferr@usp.br](mailto:ajpferr@usp.br); Tel.: +55-11-3091-1352

**Table S1.** Complete genome REV strains used in the present study.

| Strain               | Isolation year | Source          | Country  | Accession N° |
|----------------------|----------------|-----------------|----------|--------------|
| SNV                  | 1959           | Duck            | USA      | DQ003591     |
| ATCC-VR775           | 1972           | Duck            | USA      | KF313137     |
| HA9901               | 1999           | Chicken         | China    | AY842951     |
| APC-566              | 2005           | Prairie Chicken | USA      | DQ387450     |
| chicken/3337/05      | 2005           | Chicken         | Taiwan   | FJ439120     |
| goose/3410/06        | 2006           | Goose           | Taiwan   | FJ439119     |
| HLJ07I               | 2007           | Chicken         | China    | GQ375848     |
| MD-2                 | 2007           | HVT Vaccine     | China    | JX912710     |
| HLJR0901             | 2009           | Chicken         | China    | GQ415646     |
| 1105                 | 2011           | Muscovy Duck    | China    | JQ804915     |
| HA1101               | 2011           | Chicken         | China    | KF305089     |
| CY1111               | 2011           | Chicken         | China    | KJ909531     |
| GD1210               | 2012           | Chicken         | China    | KF709431     |
| SY1209               | 2012           | Chicken         | China    | KJ909530     |
| LN1201               | 2012           | Chicken         | China    | KU641115     |
| REV-TH/CBI/2013/CU-1 | 2013           | Chicken         | Thailand | MF631845     |
| USP-586              | 2014           | Chicken         | Brazil   | OK631657     |
| 104865               | 2014           | Turkey          | USA      | KJ756349     |
| GDBL1401             | 2014           | Pigeon          | China    | KU204702     |
| GDBL1402             | 2014           | Pigeon          | China    | KU204703     |
| HB2015021            | 2015           | Chicken         | China    | KY581581     |
| BJ1503               | 2015           | Chicken         | China    | MG471384     |
| IBD-C1605            | 2016           | IBDV Vaccine    | China    | KX278301     |
| SDAUR-S1             | 2017           | Chicken         | China    | MF185397     |
| USP-976              | 2018           | Chicken         | Brazil   | OK631658     |
| GX18NNR1             | 2018           | Chicken         | China    | MW046297     |
| GX19NNR1             | 2019           | Chicken         | China    | MW046295     |
| GX19YLR1             | 2019           | Chicken         | China    | MW046296     |
| CH-GD2019            | 2019           | Duck            | China    | MN812764     |
| TB01                 | 2019           | Tibetan Chicken | China    | MZ833509     |
| GD20R1               | 2020           | Chicken         | China    | MW046294     |

**Table S2.** Detection of REV and concomitant viral infections for each sample in the studied farms.

| CASE   | ID   | YEAR | STATE     | BIRDS      | AGE <sup>A</sup> | SIGNS                                                          | SAMPLE <sup>B</sup> | REV             | Coinfections                     |
|--------|------|------|-----------|------------|------------------|----------------------------------------------------------------|---------------------|-----------------|----------------------------------|
| Farm 1 | 586  | 2014 | PARANÁ    | broilers   | NI               | proventriculitis,<br>gizzard erosion                           | gizzard             | <b>positive</b> |                                  |
|        |      |      |           |            |                  |                                                                | intestine           | <b>positive</b> |                                  |
|        |      |      |           |            |                  |                                                                | liver               | <b>positive</b> |                                  |
|        |      |      |           |            |                  |                                                                | proventriculus      | <b>positive</b> | CAstV                            |
|        |      |      |           |            |                  |                                                                | spleen              | <b>positive</b> | ChPV                             |
| Farm 2 | 599  | 2015 | PARANÁ    | broilers   | NI               | proventriculitis,<br>gizzard erosion                           | thymus              | negative        | CAstV                            |
|        |      |      |           |            |                  |                                                                | gizzard             | <b>positive</b> |                                  |
|        |      |      |           |            |                  |                                                                | intestine           | <b>positive</b> |                                  |
|        |      |      |           |            |                  |                                                                | liver               | <b>positive</b> |                                  |
|        |      |      |           |            |                  |                                                                | proventriculus      | <b>positive</b> |                                  |
| Farm 3 | 976  | 2018 | SÃO PAULO | layer hens | 40               | proventriculitis,<br>stunted growth,<br>cachexia,<br>mortality | bursa               | negative        | ANV, ChPV                        |
|        |      |      |           |            |                  |                                                                | proventriculus      | <b>positive</b> | ANV, ChPV                        |
|        |      |      |           |            |                  |                                                                | thymus              | negative        | ANV, CAV, ChPV                   |
| Farm 4 | 1005 | 2018 | SÃO PAULO | layer hens | 38               | proventriculitis,<br>stunted growth,<br>cachexia,<br>mortality | bursa               | <b>positive</b> | ANV, ARV, CAV, CAstV, ChPV, FAdV |
|        |      |      |           |            |                  |                                                                | proventriculus      | negative        | ANV, ARV, CAV, CAstV, ChPV, FAdV |
|        |      |      |           |            |                  |                                                                | thymus              | negative        | ANV, ARV, CAV, ChPV              |
| Farm 5 | 1006 | 2018 | SÃO PAULO | layer hens | 32               | proventriculitis,<br>stunted growth,<br>cachexia,<br>mortality | bursa               | <b>positive</b> | ANV, ARV, CAV, CAstV, ChPV, FAdV |
|        |      |      |           |            |                  |                                                                | gizzard             | negative        | ANV, ARV, CAV, CAstV, ChPV       |
|        |      |      |           |            |                  |                                                                | proventriculus      | negative        | ANV, ARV, CAV, CAstV, ChPV       |
|        |      |      |           |            |                  |                                                                | thymus              | negative        | ANV, ARV, CAV, CAstV, ChPV       |
| Farm 6 | 1007 | 2018 | SÃO PAULO | layer hens | 32               | proventriculitis,<br>stunted growth,<br>cachexia,<br>mortality | bursa               | negative        | ANV, ARV, CAV, CAstV, ChPV       |
|        |      |      |           |            |                  |                                                                | gizzard             | <b>positive</b> | ANV, ARV, CAV, CAstV, ChPV, FAdV |
|        |      |      |           |            |                  |                                                                | proventriculus      | <b>positive</b> | ANV, ARV, CAV, CAstV, ChPV, FAdV |
|        |      |      |           |            |                  |                                                                | thymus              | negative        | ANV, ARV, CAV, CAstV             |
| Farm 7 | 1270 | 2019 | PARANÁ    | broilers   | 22               | proventriculitis,<br>gizzard erosion                           | gizzard             | <b>positive</b> | ARV, CAstV, ChPV                 |
|        |      |      |           |            |                  |                                                                | liver               | <b>positive</b> | ChPV                             |
|        |      |      |           |            |                  |                                                                | proventriculus      | <b>positive</b> | ARV, CAstV, ChPV                 |
|        |      |      |           |            |                  |                                                                | spleen              | <b>positive</b> | ChPV                             |

|         |      |      |        |          |    |                                      |                |                 |                  |
|---------|------|------|--------|----------|----|--------------------------------------|----------------|-----------------|------------------|
| Farm 8  | 1313 | 2019 | PARANÁ | broilers | 22 | proventriculitis,<br>gizzard erosion | gizzard        | negative        | ARV, CAstV, ChPV |
|         |      |      |        |          |    |                                      | liver          | <b>positive</b> | ARV, CAstV       |
|         |      |      |        |          |    |                                      | proventriculus | negative        | ARV, CAstV, ChPV |
|         |      |      |        |          |    |                                      | spleen         | <b>positive</b> | ARV, CAstV       |
| Farm 9  | 1314 | 2019 | PARANÁ | broilers | 22 | proventriculitis,<br>gizzard erosion | gizzard        | negative        | CAstV, ChPV      |
|         |      |      |        |          |    |                                      | liver          | <b>positive</b> | ARV, ChPV        |
|         |      |      |        |          |    |                                      | proventriculus | negative        | CAstV, ChPV      |
|         |      |      |        |          |    |                                      | spleen         | <b>positive</b> | ARV, ChPV        |
| Farm 10 | 1315 | 2019 | PARANÁ | broilers | 22 | proventriculitis,<br>gizzard erosion | gizzard        | <b>positive</b> | ARV, CAstV, ChPV |
|         |      |      |        |          |    |                                      | liver          | <b>positive</b> | ARV, CAstV, ChPV |
|         |      |      |        |          |    |                                      | proventriculus | <b>positive</b> | ARV, CAstV, ChPV |
|         |      |      |        |          |    |                                      | spleen         | <b>positive</b> | ARV, CAstV, ChPV |

<sup>A</sup> = age in days.

<sup>B</sup> = pool from a specific organ that had been collected from 5 different birds from the same flock.

NI = not informed.

**Table S3.** Pairwise identity matrix of nucleotides for complete genomes of the compared strains of REV.

|                                                       | [OK631657]<br>USP-586 | [DQ387450]<br>APC-566 | [KJ756349]<br>104865 | [OK631658]<br>USP-976 | [MW046297]<br>GX18NNR1 | [MW046295]<br>GX19NNR1 | [KJ909531]<br>CY1111 | [JQ804915]<br>1105 | [KY581581]<br>HB2015021 | [MW046294]<br>GD20R1 | [MW046296]<br>GX19YLR1 | [KF305089]<br>HA1101 | [KJ909530]<br>SY1209 | [FJ439120]<br>chicken/3337/05 | [FJ439119]<br>goose/3410/06 | [MF631845]<br>REV-<br>TH/CBI/2013/CU-1 | [GQ415646]<br>HLJR0901 | [MN812764]<br>CH-GD2019 | [JX912710]<br>MD-2 | [KU204703]<br>GDBL1402 | [KU204702]<br>GDBL1401 | [AY842951]<br>HA9901 | [MG471384]<br>BJ1503 | [KX278301]<br>IBD-C1605 | [KF709431]<br>GD1210 | [DQ003591]<br>SNV | [MF185397]<br>SDAUR-S1 | [KF313137]<br>ATCC-VR775 |      |
|-------------------------------------------------------|-----------------------|-----------------------|----------------------|-----------------------|------------------------|------------------------|----------------------|--------------------|-------------------------|----------------------|------------------------|----------------------|----------------------|-------------------------------|-----------------------------|----------------------------------------|------------------------|-------------------------|--------------------|------------------------|------------------------|----------------------|----------------------|-------------------------|----------------------|-------------------|------------------------|--------------------------|------|
| [OK631657] USP-586 Brazil/chicken/2014                |                       |                       |                      |                       |                        |                        |                      |                    |                         |                      |                        |                      |                      |                               |                             |                                        |                        |                         |                    |                        |                        |                      |                      |                         |                      |                   |                        |                          |      |
| [DQ387450] APC-566 USA/prairie chicken/2005           | 99.997                |                       |                      |                       |                        |                        |                      |                    |                         |                      |                        |                      |                      |                               |                             |                                        |                        |                         |                    |                        |                        |                      |                      |                         |                      |                   |                        |                          |      |
| [KJ756349] 104865 USA/turkey/2014                     | 99.996                | 99.996                |                      |                       |                        |                        |                      |                    |                         |                      |                        |                      |                      |                               |                             |                                        |                        |                         |                    |                        |                        |                      |                      |                         |                      |                   |                        |                          |      |
| [OK631658] USP-976 Brazil/chicken/2018                | 99.997                | 99.996                | 99.997               |                       |                        |                        |                      |                    |                         |                      |                        |                      |                      |                               |                             |                                        |                        |                         |                    |                        |                        |                      |                      |                         |                      |                   |                        |                          |      |
| [MW046297] GX18NNR1 China/chicken/2019                | 99.8                  | 99.8                  | 99.8                 | 99.8                  |                        |                        |                      |                    |                         |                      |                        |                      |                      |                               |                             |                                        |                        |                         |                    |                        |                        |                      |                      |                         |                      |                   |                        |                          |      |
| [MW046295] GX19NNR1 China/chicken/2019                | 99.7                  | 99.8                  | 99.8                 | 99.8                  | 99.6                   |                        |                      |                    |                         |                      |                        |                      |                      |                               |                             |                                        |                        |                         |                    |                        |                        |                      |                      |                         |                      |                   |                        |                          |      |
| [KJ909531] CY1111 China/chicken/2011                  | 99.9                  | 99.9                  | 99.9                 | 99.9                  | 99.7                   | 99.8                   |                      |                    |                         |                      |                        |                      |                      |                               |                             |                                        |                        |                         |                    |                        |                        |                      |                      |                         |                      |                   |                        |                          |      |
| [JQ804915] 1105 China/muscovy duck/2011               | 99.8                  | 99.9                  | 99.9                 | 99.9                  | 99.7                   | 99.7                   | 99.8                 |                    |                         |                      |                        |                      |                      |                               |                             |                                        |                        |                         |                    |                        |                        |                      |                      |                         |                      |                   |                        |                          |      |
| [KY581581] HB2015021 China/chicken/2015               | 99.7                  | 99.8                  | 99.8                 | 99.8                  | 99.6                   | 99.6                   | 99.7                 | 99.7               |                         |                      |                        |                      |                      |                               |                             |                                        |                        |                         |                    |                        |                        |                      |                      |                         |                      |                   |                        |                          |      |
| [MW046294] GD20R1 China/chicken/2020                  | 99.9                  | 99.9                  | 99.9                 | 99.9                  | 99.7                   | 99.7                   | 99.9                 | 99.8               | 99.7                    |                      |                        |                      |                      |                               |                             |                                        |                        |                         |                    |                        |                        |                      |                      |                         |                      |                   |                        |                          |      |
| [MW046296] GX19YLR1 China/chicken/2019                | 99.8                  | 99.8                  | 99.8                 | 99.8                  | 99.7                   | 99.8                   | 99.8                 | 99.8               | 99.7                    | 99.8                 |                        |                      |                      |                               |                             |                                        |                        |                         |                    |                        |                        |                      |                      |                         |                      |                   |                        |                          |      |
| [KF305089] HA1101 China/chicken/2011                  | 99.9                  | 99.9                  | 99.9                 | 99.9                  | 99.7                   | 99.8                   | 99.8                 | 99.8               | 99.7                    | 99.8                 | 99.9                   |                      |                      |                               |                             |                                        |                        |                         |                    |                        |                        |                      |                      |                         |                      |                   |                        |                          |      |
| [KJ909530] SY1209 China/chicken/2012                  | 99.8                  | 99.8                  | 99.9                 | 99.9                  | 99.7                   | 99.7                   | 99.8                 | 99.8               | 99.7                    | 99.8                 | 99.8                   | 99.9                 |                      |                               |                             |                                        |                        |                         |                    |                        |                        |                      |                      |                         |                      |                   |                        |                          |      |
| [FJ439120] chicken/3337/05 Taiwan/chicken/2005        | 99.9                  | 99.9                  | 99.9                 | 99.9                  | 99.7                   | 99.7                   | 99.8                 | 99.8               | 99.7                    | 99.8                 | 99.8                   | 99.9                 | 99.8                 |                               |                             |                                        |                        |                         |                    |                        |                        |                      |                      |                         |                      |                   |                        |                          |      |
| [FJ439119] goose/3410/06 Taiwan/goose/2006            | 99.9                  | 99.9                  | 99.9                 | 99.9                  | 99.7                   | 99.8                   | 99.8                 | 99.8               | 99.7                    | 99.8                 | 99.9                   | 99.9                 | 99.9                 | 99.9                          | 99.9                        |                                        |                        |                         |                    |                        |                        |                      |                      |                         |                      |                   |                        |                          |      |
| [MF631845] REV-TH/CBI/2013/CU-1 Thailand/chicken/2013 | 99.9                  | 99.9                  | 99.9                 | 99.9                  | 99.8                   | 99.8                   | 99.9                 | 99.9               | 99.7                    | 99.8                 | 99.9                   | 100.0                | 99.9                 | 99.9                          | 99.998                      |                                        |                        |                         |                    |                        |                        |                      |                      |                         |                      |                   |                        |                          |      |
| [GQ415646] HLJR0901 China/chicken/2009                | 99.9                  | 99.9                  | 99.9                 | 99.9                  | 99.7                   | 99.8                   | 99.8                 | 99.8               | 99.7                    | 99.8                 | 99.9                   | 99.9                 | 99.9                 | 99.9                          | 99.997                      | 99.997                                 |                        |                         |                    |                        |                        |                      |                      |                         |                      |                   |                        |                          |      |
| [MN812764] CH-GD2019 China/duck/2019                  | 99.7                  | 99.7                  | 99.7                 | 99.7                  | 99.6                   | 99.6                   | 99.7                 | 99.7               | 99.5                    | 99.6                 | 99.7                   | 99.8                 | 99.7                 | 99.7                          | 99.8                        | 99.8                                   | 99.8                   |                         |                    |                        |                        |                      |                      |                         |                      |                   |                        |                          |      |
| [JX912710] MD-2 China/HVT vaccine/2007                | 99.8                  | 99.8                  | 99.9                 | 99.9                  | 99.7                   | 99.7                   | 99.8                 | 99.8               | 99.7                    | 99.8                 | 99.8                   | 99.9                 | 99.8                 | 99.8                          | 99.9                        | 99.9                                   | 99.9                   | 99.9                    | 99.7               |                        |                        |                      |                      |                         |                      |                   |                        |                          |      |
| [KU204703] GDBL1402 China/young pigeon/2014           | 99.8                  | 99.8                  | 99.8                 | 99.8                  | 99.7                   | 99.7                   | 99.7                 | 99.7               | 99.6                    | 99.7                 | 99.8                   | 99.8                 | 99.8                 | 99.8                          | 99.8                        | 99.9                                   | 99.9                   | 99.9                    | 99.7               | 99.997                 |                        |                      |                      |                         |                      |                   |                        |                          |      |
| [KU204702] GDBL1401 China/adult pigeon/2014           | 99.8                  | 99.8                  | 99.8                 | 99.8                  | 99.6                   | 99.6                   | 99.7                 | 99.7               | 99.6                    | 99.7                 | 99.7                   | 99.8                 | 99.7                 | 99.8                          | 99.8                        | 99.9                                   | 99.8                   | 99.7                    | 99.9               | 99.998                 |                        |                      |                      |                         |                      |                   |                        |                          |      |
| [AY842951] HA9901 China/chicken/1999                  | 98.1                  | 98.1                  | 98.1                 | 98.0                  | 97.9                   | 97.8                   | 98.0                 | 97.9               | 97.8                    | 98.0                 | 97.9                   | 98.0                 | 97.9                 | 97.9                          | 98.0                        | 98.0                                   | 97.8                   | 98.0                    | 97.9               | 97.9                   | 97.9                   | 97.9                 | 97.9                 | 97.9                    | 97.9                 | 97.9              | 97.9                   | 97.9                     | 97.9 |
| [MG471384] BJ1503 China/chicken/2015                  | 98.1                  | 98.1                  | 98.1                 | 98.1                  | 97.9                   | 97.9                   | 98.0                 | 98.0               | 97.9                    | 98.0                 | 98.0                   | 98.0                 | 98.0                 | 98.0                          | 98.0                        | 98.1                                   | 98.0                   | 97.9                    | 98.0               | 98.0                   | 98.0                   | 99.7                 |                      |                         |                      |                   |                        |                          |      |
| [KX278301] IBD-C1605 China/IBDV vaccine/2016          | 96.4                  | 96.3                  | 96.4                 | 96.3                  | 96.2                   | 96.2                   | 96.3                 | 96.3               | 96.1                    | 96.3                 | 96.2                   | 96.3                 | 96.3                 | 96.3                          | 96.3                        | 96.3                                   | 96.3                   | 96.2                    | 96.3               | 96.3                   | 96.2                   | 94.6                 | 94.7                 |                         |                      |                   |                        |                          |      |
| [KF709431] GD1210 China/chicken/2012                  | 96.5                  | 96.5                  | 96.5                 | 96.5                  | 96.3                   | 96.3                   | 96.4                 | 96.4               | 96.3                    | 96.4                 | 96.3                   | 96.4                 | 96.3                 | 96.4                          | 96.4                        | 96.4                                   | 96.4                   | 96.2                    | 96.4               | 96.3                   | 96.3                   | 94.8                 | 94.9                 | 99.3                    |                      |                   |                        |                          |      |
| [DQ003591] SNV USA/duck/1959                          | 96.4                  | 96.4                  | 96.4                 | 96.4                  | 96.2                   | 96.2                   | 96.3                 | 96.3               | 96.2                    | 96.3                 | 96.2                   | 96.3                 | 96.3                 | 96.3                          | 96.3                        | 96.3                                   | 96.3                   | 96.2                    | 96.3               | 96.2                   | 96.2                   | 94.8                 | 94.8                 | 99.2                    | 99.9                 |                   |                        |                          |      |
| [MF185397] SDAUR-S1 China/chicken/2017                | 96.2                  | 96.2                  | 96.2                 | 96.2                  | 96.1                   | 96.0                   | 96.1                 | 96.1               | 96.0                    | 96.2                 | 96.1                   | 96.2                 | 96.1                 | 96.1                          | 96.2                        | 96.2                                   | 96.2                   | 96.0                    | 96.1               | 96.1                   | 96.1                   | 94.6                 | 94.6                 | 99.0                    | 99.7                 | 99.8              |                        |                          |      |
| [KF313137] ATCC-VR775 USA/duck/1972                   | 95.2                  | 95.2                  | 95.2                 | 95.1                  | 95.0                   | 95.0                   | 95.1                 | 95.0               | 95.0                    | 95.1                 | 95.0                   | 95.1                 | 95.0                 | 95.1                          | 95.1                        | 95.1                                   | 95.1                   | 94.9                    | 95.0               | 95.0                   | 95.0                   | 93.6                 | 93.6                 | 97.0                    | 97.6                 | 97.5              | 97.4                   |                          |      |

**Table S4.** Pairwise identity matrix of nucleotides for long terminal repeats (LTRs) of the compared strains of REV.

|                                                       | [MG471384]<br>BJ1503 | [AY842951]<br>HA9901 | [KJ756349]<br>104865 | [DQ387450]<br>APC-566 | [OK631658]<br>USP-976 | [KU204702]<br>GDBL1401 | [KU204703]<br>GDBL1402 | [JX912710]<br>MD-2 | [GX415646]<br>HLJR0901 | [MT138121]<br>gps222ret1 | [MN812764]<br>CH-GD2019 | [MF631845]<br>REV-TH/CBI/2013/CU-1 | [MT138120]<br>cat223ret1 | [FJ439119]<br>goose/3410/06 | [KJ909530]<br>SY1209 | [MW046296]<br>GX19YLR1 | [KF305089]<br>HA1101 | [FJ439120]<br>chicken/3337/05 | [MW046295]<br>GX19NNR1 | [KJ909531]<br>CY1111 | [KY581581]<br>HB2015021 | [MW046297]<br>GX18NNR1 | [JQ804915]<br>1105 | [MW046294]<br>GD20R1 | [OK631657]<br>USP-586 | [MF185397]<br>SDAUR-S1 | [DQ003591]<br>SNV | [KF709431]<br>GD1210 | [KF313137]<br>ATCC-VR775 | [KX278301]<br>IBD-C1605 |    |
|-------------------------------------------------------|----------------------|----------------------|----------------------|-----------------------|-----------------------|------------------------|------------------------|--------------------|------------------------|--------------------------|-------------------------|------------------------------------|--------------------------|-----------------------------|----------------------|------------------------|----------------------|-------------------------------|------------------------|----------------------|-------------------------|------------------------|--------------------|----------------------|-----------------------|------------------------|-------------------|----------------------|--------------------------|-------------------------|----|
| [MG471384] BJ1503 China/chicken/2015                  |                      |                      |                      |                       |                       |                        |                        |                    |                        |                          |                         |                                    |                          |                             |                      |                        |                      |                               |                        |                      |                         |                        |                    |                      |                       |                        |                   |                      |                          |                         |    |
| [AY842951] HA9901 China/chicken/1999                  | 99.8                 |                      |                      |                       |                       |                        |                        |                    |                        |                          |                         |                                    |                          |                             |                      |                        |                      |                               |                        |                      |                         |                        |                    |                      |                       |                        |                   |                      |                          |                         |    |
| [KJ756349] 104865 USA/turkey/2014                     | 97.7                 | 97.9                 |                      |                       |                       |                        |                        |                    |                        |                          |                         |                                    |                          |                             |                      |                        |                      |                               |                        |                      |                         |                        |                    |                      |                       |                        |                   |                      |                          |                         |    |
| [DQ387450] APC-566 USA/prairie chicken/2005           | 97.7                 | 97.9                 | 99.9                 |                       |                       |                        |                        |                    |                        |                          |                         |                                    |                          |                             |                      |                        |                      |                               |                        |                      |                         |                        |                    |                      |                       |                        |                   |                      |                          |                         |    |
| [OK631658] USP-976 Brazil/chicken/2018                | 97.7                 | 97.9                 | 99.9                 | 99.9                  |                       |                        |                        |                    |                        |                          |                         |                                    |                          |                             |                      |                        |                      |                               |                        |                      |                         |                        |                    |                      |                       |                        |                   |                      |                          |                         |    |
| [KU204702] GDBL1401 China/adult pigeon/2014           | 97.5                 | 97.7                 | 99.4                 | 99.4                  | 99.4                  |                        |                        |                    |                        |                          |                         |                                    |                          |                             |                      |                        |                      |                               |                        |                      |                         |                        |                    |                      |                       |                        |                   |                      |                          |                         |    |
| [KU204703] GDBL1402 China/young pigeon/2014           | 97.5                 | 97.7                 | 99.4                 | 99.4                  | 99.4                  | 99.9                   |                        |                    |                        |                          |                         |                                    |                          |                             |                      |                        |                      |                               |                        |                      |                         |                        |                    |                      |                       |                        |                   |                      |                          |                         |    |
| [JX912710] MD-2 China/HVT vaccine/2007                | 97.7                 | 97.9                 | 99.6                 | 99.6                  | 99.6                  | 99.8                   | 99.8                   |                    |                        |                          |                         |                                    |                          |                             |                      |                        |                      |                               |                        |                      |                         |                        |                    |                      |                       |                        |                   |                      |                          |                         |    |
| [GX415646] HLJR0901 China/chicken/2009                | 97.7                 | 97.9                 | 99.9                 | 99.9                  | 99.9                  | 99.4                   | 99.4                   | 99.6               |                        |                          |                         |                                    |                          |                             |                      |                        |                      |                               |                        |                      |                         |                        |                    |                      |                       |                        |                   |                      |                          |                         |    |
| [MT138121] gps222ret1 China/Cabots tragopan/2018      | 97.7                 | 97.9                 | 99.9                 | 99.9                  | 99.9                  | 99.4                   | 99.4                   | 99.6               | 99.9                   |                          |                         |                                    |                          |                             |                      |                        |                      |                               |                        |                      |                         |                        |                    |                      |                       |                        |                   |                      |                          |                         |    |
| [MN812764] CH-GD2019 China/duck/2019                  | 97.7                 | 97.9                 | 99.9                 | 99.9                  | 99.9                  | 99.4                   | 99.4                   | 99.6               | 99.9                   | 99.9                     |                         |                                    |                          |                             |                      |                        |                      |                               |                        |                      |                         |                        |                    |                      |                       |                        |                   |                      |                          |                         |    |
| [MF631845] REV-TH/CBI/2013/CU-1 Thailand/chicken/2013 | 97.7                 | 97.9                 | 99.9                 | 99.9                  | 99.9                  | 99.4                   | 99.4                   | 99.6               | 99.9                   | 99.9                     | 99.9                    |                                    |                          |                             |                      |                        |                      |                               |                        |                      |                         |                        |                    |                      |                       |                        |                   |                      |                          |                         |    |
| [MT138120] cat223ret1 China/Cabots tragopan/2018      | 97.5                 | 97.7                 | 99.8                 | 99.8                  | 99.8                  | 99.6                   | 99.6                   | 99.8               | 99.8                   | 99.8                     | 99.8                    | 99.8                               | 99.8                     |                             |                      |                        |                      |                               |                        |                      |                         |                        |                    |                      |                       |                        |                   |                      |                          |                         |    |
| [FJ439119] goose/3410/06 Taiwan/goose/2006            | 97.7                 | 97.9                 | 99.9                 | 99.9                  | 99.9                  | 99.4                   | 99.4                   | 99.6               | 99.9                   | 99.9                     | 99.9                    | 99.9                               | 99.8                     |                             |                      |                        |                      |                               |                        |                      |                         |                        |                    |                      |                       |                        |                   |                      |                          |                         |    |
| [KJ909530] SY1209 China/chicken/2012                  | 97.7                 | 97.9                 | 99.9                 | 99.9                  | 99.9                  | 99.4                   | 99.4                   | 99.6               | 99.9                   | 99.9                     | 99.9                    | 99.9                               | 99.8                     | 99.9                        |                      |                        |                      |                               |                        |                      |                         |                        |                    |                      |                       |                        |                   |                      |                          |                         |    |
| [MW046296] GX19YLR1 China/chicken/2019                | 97.5                 | 97.7                 | 99.8                 | 99.8                  | 99.8                  | 99.3                   | 99.3                   | 99.4               | 99.8                   | 99.8                     | 99.8                    | 99.8                               | 99.6                     | 99.8                        | 99.8                 |                        |                      |                               |                        |                      |                         |                        |                    |                      |                       |                        |                   |                      |                          |                         |    |
| [KF305089] HA1101 China/chicken/2011                  | 97.7                 | 97.9                 | 99.9                 | 99.9                  | 99.9                  | 99.4                   | 99.4                   | 99.6               | 99.9                   | 99.9                     | 99.9                    | 99.9                               | 99.8                     | 99.9                        | 99.9                 | 99.8                   |                      |                               |                        |                      |                         |                        |                    |                      |                       |                        |                   |                      |                          |                         |    |
| [FJ439120] chicken/3337/05 Taiwan/chicken/2005        | 97.7                 | 97.9                 | 99.9                 | 99.9                  | 99.9                  | 99.4                   | 99.4                   | 99.6               | 99.9                   | 99.9                     | 99.9                    | 99.9                               | 99.8                     | 99.9                        | 99.9                 | 99.8                   | 99.9                 |                               |                        |                      |                         |                        |                    |                      |                       |                        |                   |                      |                          |                         |    |
| [MW046295] GX19NNR1 China/chicken/2019                | 97.7                 | 97.9                 | 99.9                 | 99.9                  | 99.9                  | 99.4                   | 99.4                   | 99.6               | 99.9                   | 99.9                     | 99.9                    | 99.9                               | 99.8                     | 99.9                        | 99.9                 | 99.8                   | 99.9                 | 99.9                          |                        |                      |                         |                        |                    |                      |                       |                        |                   |                      |                          |                         |    |
| [KJ909531] CY1111 China/chicken/2011                  | 97.7                 | 97.9                 | 99.9                 | 99.9                  | 99.9                  | 99.4                   | 99.4                   | 99.6               | 99.9                   | 99.9                     | 99.9                    | 99.9                               | 99.8                     | 99.9                        | 99.9                 | 99.8                   | 99.9                 | 99.9                          | 99.9                   |                      |                         |                        |                    |                      |                       |                        |                   |                      |                          |                         |    |
| [KY581581] HB2015021 China/chicken/2015               | 97.7                 | 97.9                 | 99.9                 | 99.9                  | 99.9                  | 99.4                   | 99.4                   | 99.6               | 99.9                   | 99.9                     | 99.9                    | 99.9                               | 99.8                     | 99.9                        | 99.9                 | 99.8                   | 99.9                 | 99.9                          | 99.9                   | 99.9                 |                         |                        |                    |                      |                       |                        |                   |                      |                          |                         |    |
| [MW046297] GX18NNR1 China/chicken/2019                | 97.5                 | 97.7                 | 99.8                 | 99.8                  | 99.8                  | 99.3                   | 99.3                   | 99.4               | 99.8                   | 99.8                     | 99.8                    | 99.8                               | 99.6                     | 99.8                        | 99.8                 | 99.8                   | 99.8                 | 99.8                          | 99.8                   | 99.8                 | 99.8                    |                        |                    |                      |                       |                        |                   |                      |                          |                         |    |
| [JQ804915] 1105 China/muscovy duck/2011               | 97.7                 | 97.9                 | 99.9                 | 99.9                  | 99.9                  | 99.4                   | 99.4                   | 99.6               | 99.9                   | 99.9                     | 99.9                    | 99.9                               | 99.8                     | 99.9                        | 99.9                 | 99.8                   | 99.9                 | 99.9                          | 99.9                   | 99.9                 | 99.9                    | 99.9                   | 99.8               |                      |                       |                        |                   |                      |                          |                         |    |
| [MW046294] GD20R1 China/chicken/2020                  | 97.7                 | 97.9                 | 99.9                 | 99.9                  | 99.9                  | 99.4                   | 99.4                   | 99.6               | 99.9                   | 99.9                     | 99.9                    | 99.9                               | 99.8                     | 99.9                        | 99.9                 | 99.8                   | 99.9                 | 99.9                          | 99.9                   | 99.9                 | 99.9                    | 99.9                   | 99.9               | 99.9                 | 99.8                  |                        |                   |                      |                          |                         |    |
| [OK631657] USP-586 Brazil/chicken/2014                | 97.7                 | 97.9                 | 99.9                 | 99.9                  | 99.9                  | 99.4                   | 99.4                   | 99.6               | 99.9                   | 99.9                     | 99.9                    | 99.9                               | 99.8                     | 99.9                        | 99.9                 | 99.8                   | 99.9                 | 99.9                          | 99.9                   | 99.9                 | 99.9                    | 99.9                   | 99.9               | 99.9                 | 99.9                  | 99.9                   |                   |                      |                          |                         |    |
| [MF185397] SDAUR-S1 China/chicken/2017                | 91.9                 | 92.1                 | 94.4                 | 94.4                  | 94.4                  | 93.8                   | 93.8                   | 94                 | 94.4                   | 94.4                     | 94.4                    | 94.4                               | 94.2                     | 94.4                        | 94.4                 | 94.2                   | 94.4                 | 94.4                          | 94.4                   | 94.4                 | 94.4                    | 94.4                   | 94.4               | 94.2                 | 94.4                  | 94.4                   | 94.4              | 94.4                 | 94.4                     | 94.4                    |    |
| [DQ003591] SNV USA/duck/1959                          | 92.1                 | 92.3                 | 94.2                 | 94.2                  | 94.2                  | 93.8                   | 93.8                   | 94                 | 94.2                   | 94.2                     | 94.2                    | 94.2                               | 94.2                     | 94.2                        | 94.2                 | 94.2                   | 94.2                 | 94.2                          | 94.2                   | 94.2                 | 94.2                    | 94.2                   | 94.2               | 94.2                 | 94.2                  | 94.2                   | 94.2              | 94.2                 | 94.2                     | 94.2                    |    |
| [KF709431] GD1210 China/chicken/2012                  | 92.4                 | 92.6                 | 94.6                 | 94.6                  | 94.6                  | 94.2                   | 94.2                   | 94.4               | 94.6                   | 94.6                     | 94.6                    | 94.6                               | 94.6                     | 94.6                        | 94.6                 | 94.6                   | 94.6                 | 94.6                          | 94.6                   | 94.6                 | 94.6                    | 94.6                   | 94.6               | 94.6                 | 94.6                  | 94.6                   | 94.6              | 94.6                 | 94.6                     | 94.6                    |    |
| [KF313137] ATCC-VR775 USA/duck/1972                   | 89.7                 | 89.9                 | 92                   | 92                    | 92                    | 91.6                   | 91.6                   | 91.8               | 92                     | 92                       | 92                      | 92                                 | 92                       | 92                          | 92                   | 91.8                   | 92                   | 92                            | 92                     | 92                   | 92                      | 92                     | 92                 | 92                   | 92                    | 92                     | 92                | 92                   | 92                       | 92                      |    |
| [KX278301] IBD-C1605 China/IBDV vaccine/2016          | 92.1                 | 92.3                 | 94.6                 | 94.6                  | 94.6                  | 94.2                   | 94.2                   | 94.4               | 94.6                   | 94.6                     | 94.6                    | 94.6                               | 94.6                     | 94.6                        | 94.6                 | 94.6                   | 94.6                 | 94.6                          | 94.6                   | 94.6                 | 94.6                    | 94.6                   | 94.6               | 94.6                 | 94.6                  | 94.6                   | 94.6              | 94.6                 | 94.6                     | 94.6                    | 96 |



**Table S5.** Pairwise identity matrix of nucleotides<sup>1</sup> and deduced amino acids<sup>2</sup> for the *gag* gene of the compared strains of REV.

|                                                          | [MG471384]<br>BJ1503 | [AY842951]<br>HA9901 | [MH709124]<br>FWPV-MN00.2 | [KY498002]<br>Ind/Guj-2011 | [KJ756349]<br>104865 | [DQ387450]<br>APC-566 | [USP-976]<br>USP-976 | [MW142017]<br>FWPV-S | [MH734528]<br>FWPV-SD15-670.2 | [MW833509]<br>TB01 | [KU204702]<br>GDBL1401 | [KU204703]<br>GDBL1402 | [KU641115]<br>LN1201 | [DX912710]<br>MD-2 | [GQ415646]<br>HLJ0901 | [MT138121]<br>gps222re1 | [NN812764]<br>CH-GD2019 | [MF631845]<br>REV-T/CBI/2013/CU-1 | [VT138120]<br>cal232re1 | [FJ439119]<br>goose/41006 | [KJ909530]<br>SY1209 | [MW046296]<br>KF305089 | [MW046294]<br>GX19NNR1 | [FJ439120]<br>chicken233705 | [MW046295]<br>GX19NNR1 | [KJ909531]<br>CY1111 | [KY581581]<br>HB2015021 | [MW046297]<br>GX18NNR1 | [QJ004915]<br>J1005 | [MW046294]<br>GD20R1 | [AF246698]<br>IL-74 | [OK631657]<br>USP-586 | [MF185397]<br>SFAUR-S1 | [QJ003591]<br>SNV | [KF709431]<br>GD1210 | [KF313137]<br>ATCC-VR775 | [GX275848]<br>HLJ07 | [GX278301]<br>BD-1605 |      |
|----------------------------------------------------------|----------------------|----------------------|---------------------------|----------------------------|----------------------|-----------------------|----------------------|----------------------|-------------------------------|--------------------|------------------------|------------------------|----------------------|--------------------|-----------------------|-------------------------|-------------------------|-----------------------------------|-------------------------|---------------------------|----------------------|------------------------|------------------------|-----------------------------|------------------------|----------------------|-------------------------|------------------------|---------------------|----------------------|---------------------|-----------------------|------------------------|-------------------|----------------------|--------------------------|---------------------|-----------------------|------|
| [MG471384] BJ1503 China/chicken/2015                     | 99.7                 | 99.8                 | 98.2                      | 98.2                       | 98.2                 | 98.2                  | 98.2                 | 98.2                 | 98.2                          | 98.0               | 98.2                   | 98.2                   | 98.2                 | 98.2               | 98.2                  | 98.2                    | 97.6                    | 98.2                              | 97.8                    | 98.2                      | 97.6                 | 98.0                   | 98.2                   | 97.8                        | 97.6                   | 97.6                 | 98.0                    | 97.6                   | 97.6                | 98.2                 | 98.2                | 96.0                  | 96.4                   | 96.7              | 95.2                 | 96.6                     | 94.4                |                       |      |
| [AY842951] HA9901 China/chicken/1999                     | 99.7                 | 99.8                 | 98.0                      | 98.0                       | 98.0                 | 98.0                  | 98.0                 | 98.0                 | 98.0                          | 97.8               | 98.0                   | 98.0                   | 98.0                 | 98.0               | 98.0                  | 98.0                    | 97.4                    | 98.0                              | 97.6                    | 98.0                      | 97.6                 | 98.0                   | 98.2                   | 97.8                        | 97.6                   | 97.6                 | 98.0                    | 97.6                   | 97.6                | 98.2                 | 98.2                | 96.0                  | 96.4                   | 96.7              | 95.2                 | 96.6                     | 94.2                |                       |      |
| [MH709124] FWPV-MN00.2 USA/chicken/2000                  | 98.1                 | 98.1                 | 99.9                      | 99.9                       | 99.9                 | 99.9                  | 99.9                 | 99.9                 | 99.9                          | 99.6               | 99.8                   | 99.8                   | 99.8                 | 99.8               | 99.8                  | 99.8                    | 99.2                    | 98.8                              | 99.4                    | 99.8                      | 99.2                 | 99.8                   | 99.6                   | 99.8                        | 99.4                   | 99.4                 | 99.8                    | 99.4                   | 99.4                | 99.6                 | 99.8                | 99.8                  | 97.0                   | 97.4              | 97.8                 | 96.2                     | 97.6                | 95.8                  |      |
| [KY498002] Ind/Guj-2011 India/poultry/2011               | 98.2                 | 98.1                 | 99.9                      | 99.9                       | 99.9                 | 99.9                  | 99.9                 | 99.9                 | 99.9                          | 99.6               | 99.8                   | 99.8                   | 99.8                 | 99.8               | 99.8                  | 99.8                    | 99.2                    | 98.8                              | 99.4                    | 99.8                      | 99.2                 | 99.8                   | 99.6                   | 99.8                        | 99.4                   | 99.4                 | 99.8                    | 99.4                   | 99.4                | 99.6                 | 99.8                | 99.8                  | 97.0                   | 97.4              | 97.8                 | 96.2                     | 97.6                | 95.8                  |      |
| [KJ756349] 104865 USA/turkey/2014                        | 98.2                 | 98.1                 | 99.9                      | 99.9                       | 99.9                 | 99.9                  | 99.9                 | 99.9                 | 99.9                          | 99.6               | 99.8                   | 99.8                   | 99.8                 | 99.8               | 99.8                  | 99.8                    | 99.2                    | 98.8                              | 99.4                    | 99.8                      | 99.2                 | 99.8                   | 99.6                   | 99.8                        | 99.4                   | 99.4                 | 99.8                    | 99.4                   | 99.4                | 99.6                 | 99.8                | 99.8                  | 97.0                   | 97.4              | 97.8                 | 96.2                     | 97.6                | 95.8                  |      |
| [DQ387450] APC-566 USA/prairie chicken/2005              | 98.2                 | 98.1                 | 99.9                      | 99.9                       | 99.9                 | 99.9                  | 99.9                 | 99.9                 | 99.9                          | 99.6               | 99.8                   | 99.8                   | 99.8                 | 99.8               | 99.8                  | 99.8                    | 99.2                    | 98.8                              | 99.4                    | 99.8                      | 99.2                 | 99.8                   | 99.6                   | 99.8                        | 99.4                   | 99.4                 | 99.8                    | 99.4                   | 99.4                | 99.6                 | 99.8                | 99.8                  | 97.0                   | 97.4              | 97.8                 | 96.2                     | 97.6                | 95.8                  |      |
| [USP-976] BZL/chicken/2018                               | 98.2                 | 98.1                 | 99.9                      | 99.9                       | 99.9                 | 99.9                  | 99.9                 | 99.9                 | 99.9                          | 99.6               | 99.8                   | 99.8                   | 99.8                 | 99.8               | 99.8                  | 99.8                    | 99.2                    | 98.8                              | 99.4                    | 99.8                      | 99.2                 | 99.8                   | 99.6                   | 99.8                        | 99.4                   | 99.4                 | 99.8                    | 99.4                   | 99.4                | 99.6                 | 99.8                | 99.8                  | 97.0                   | 97.4              | 97.8                 | 96.2                     | 97.6                | 95.8                  |      |
| [MW142017] FWPV-S Australia/vaccine/1997                 | 98.2                 | 98.1                 | 99.9                      | 99.9                       | 99.9                 | 99.9                  | 99.9                 | 99.9                 | 99.9                          | 99.6               | 99.8                   | 99.8                   | 99.8                 | 99.8               | 99.8                  | 99.8                    | 99.2                    | 98.8                              | 99.4                    | 99.8                      | 99.2                 | 99.8                   | 99.6                   | 99.8                        | 99.4                   | 99.4                 | 99.8                    | 99.4                   | 99.4                | 99.6                 | 99.8                | 99.8                  | 97.0                   | 97.4              | 97.8                 | 96.2                     | 97.6                | 95.8                  |      |
| [MH734528] FWPV-SD15-670.2 USA/Merriams wild turkey/2015 | 98.2                 | 98.1                 | 99.9                      | 99.9                       | 99.9                 | 99.9                  | 99.9                 | 99.9                 | 99.9                          | 99.6               | 99.8                   | 99.8                   | 99.8                 | 99.8               | 99.8                  | 99.8                    | 99.2                    | 98.8                              | 99.4                    | 99.8                      | 99.2                 | 99.8                   | 99.6                   | 99.8                        | 99.4                   | 99.4                 | 99.8                    | 99.4                   | 99.4                | 99.6                 | 99.8                | 99.8                  | 97.0                   | 97.4              | 97.8                 | 96.2                     | 97.6                | 95.8                  |      |
| [MT833509] TB01 China/Tibetan chicken/2019               | 98.0                 | 97.9                 | 99.7                      | 99.8                       | 99.8                 | 99.8                  | 99.8                 | 99.8                 | 99.8                          | 99.8               | 99.8                   | 99.8                   | 99.8                 | 99.8               | 99.8                  | 99.8                    | 99.2                    | 98.8                              | 99.4                    | 99.8                      | 99.2                 | 99.8                   | 99.6                   | 99.8                        | 99.4                   | 99.0                 | 99.4                    | 99.0                   | 99.2                | 99.4                 | 99.4                | 96.6                  | 97.0                   | 97.4              | 95.8                 | 97.2                     | 95.8                |                       |      |
| [KU204702] GDBL1401 China/adult pigeon/2014              | 98.1                 | 98.0                 | 99.8                      | 99.9                       | 99.9                 | 99.9                  | 99.9                 | 99.9                 | 99.9                          | 99.9               | 99.9                   | 99.9                   | 99.9                 | 99.9               | 99.9                  | 99.9                    | 99.4                    | 99.6                              | 99.9                    | 99.4                      | 99.9                 | 99.8                   | 99.8                   | 99.9                        | 99.6                   | 99.2                 | 99.6                    | 99.2                   | 99.2                | 99.4                 | 99.6                | 99.6                  | 96.8                   | 97.2              | 97.6                 | 96.0                     | 97.4                | 96.0                  |      |
| [KU204703] GDBL1402 China/young pigeon/2014              | 98.1                 | 98.0                 | 99.8                      | 99.9                       | 99.9                 | 99.9                  | 99.9                 | 99.9                 | 99.9                          | 99.9               | 99.9                   | 99.9                   | 99.9                 | 99.9               | 99.9                  | 99.9                    | 99.4                    | 99.6                              | 99.9                    | 99.4                      | 99.9                 | 99.8                   | 99.9                   | 99.6                        | 99.2                   | 99.6                 | 99.2                    | 99.2                   | 99.4                | 99.6                 | 99.6                | 96.8                  | 97.2                   | 97.6              | 96.0                 | 97.4                     | 96.0                |                       |      |
| [KU641115] LN1201 China/chicken/2012                     | 98.1                 | 98.0                 | 99.8                      | 99.9                       | 99.9                 | 99.9                  | 99.9                 | 99.9                 | 99.9                          | 99.9               | 99.9                   | 99.9                   | 99.9                 | 99.9               | 99.9                  | 99.9                    | 99.4                    | 99.6                              | 99.9                    | 99.4                      | 99.9                 | 99.8                   | 99.9                   | 99.6                        | 99.2                   | 99.6                 | 99.2                    | 99.2                   | 99.4                | 99.6                 | 99.6                | 96.8                  | 97.2                   | 97.6              | 96.0                 | 97.4                     | 96.0                |                       |      |
| [JX912710] MD-2 China/HVT vaccine/2007                   | 98.1                 | 98.0                 | 99.8                      | 99.9                       | 99.9                 | 99.9                  | 99.9                 | 99.9                 | 99.9                          | 99.9               | 99.9                   | 99.9                   | 99.9                 | 99.9               | 99.9                  | 99.9                    | 99.4                    | 99.6                              | 99.9                    | 99.4                      | 99.9                 | 99.8                   | 99.9                   | 99.6                        | 99.2                   | 99.6                 | 99.2                    | 99.2                   | 99.4                | 99.6                 | 99.6                | 96.8                  | 97.2                   | 97.6              | 96.0                 | 97.4                     | 96.0                |                       |      |
| [GQ415646] HLJ0901 China/chicken/2009                    | 98.1                 | 98.0                 | 99.8                      | 99.9                       | 99.9                 | 99.9                  | 99.9                 | 99.9                 | 99.9                          | 99.9               | 99.9                   | 99.9                   | 99.9                 | 99.9               | 99.9                  | 99.9                    | 99.4                    | 99.6                              | 99.9                    | 99.4                      | 99.9                 | 99.8                   | 99.9                   | 99.6                        | 99.2                   | 99.6                 | 99.2                    | 99.2                   | 99.4                | 99.6                 | 99.6                | 96.8                  | 97.2                   | 97.6              | 96.0                 | 97.4                     | 96.0                |                       |      |
| [MT138121] gps222re1 China/Cabots tragopan/2018          | 98.1                 | 98.0                 | 99.8                      | 99.9                       | 99.9                 | 99.9                  | 99.9                 | 99.9                 | 99.9                          | 99.9               | 99.9                   | 99.9                   | 99.9                 | 99.9               | 99.9                  | 99.9                    | 99.4                    | 99.6                              | 99.9                    | 99.4                      | 99.9                 | 99.8                   | 99.9                   | 99.6                        | 99.2                   | 99.6                 | 99.2                    | 99.2                   | 99.4                | 99.6                 | 99.6                | 96.8                  | 97.2                   | 97.6              | 96.0                 | 97.4                     | 96.0                |                       |      |
| [NN812764] CH-GD2019 China/cuckoo/2019                   | 97.9                 | 97.8                 | 99.6                      | 99.7                       | 99.7                 | 99.7                  | 99.7                 | 99.7                 | 99.7                          | 99.7               | 99.7                   | 99.8                   | 99.8                 | 99.8               | 99.8                  | 99.8                    | 99.4                    | 99.0                              | 99.4                    | 99.8                      | 99.4                 | 99.2                   | 99.4                   | 99.0                        | 98.6                   | 99.0                 | 98.6                    | 98.6                   | 98.8                | 99.0                 | 96.2                | 96.6                  | 96.9                   | 95.4              | 96.8                 | 95.4                     |                     |                       |      |
| [MF631845] REV-T/CBI/2013/CU-1 Thailand/chicken/2013     | 98.1                 | 98.1                 | 99.9                      | 99.9                       | 99.9                 | 99.9                  | 99.9                 | 99.9                 | 99.9                          | 99.9               | 99.9                   | 99.9                   | 99.9                 | 99.9               | 99.9                  | 99.9                    | 99.7                    | 99.6                              | 99.9                    | 99.6                      | 99.9                 | 99.8                   | 99.9                   | 99.6                        | 99.2                   | 99.6                 | 99.2                    | 99.2                   | 99.4                | 99.6                 | 99.6                | 96.8                  | 97.2                   | 97.6              | 96.0                 | 97.4                     | 96.0                |                       |      |
| [VT138120] cal232re1 China/Cabots tragopan/2018          | 98.0                 | 97.9                 | 99.7                      | 99.8                       | 99.8                 | 99.8                  | 99.8                 | 99.8                 | 99.8                          | 99.7               | 99.8                   | 99.8                   | 99.8                 | 99.8               | 99.8                  | 99.8                    | 99.6                    | 99.9                              | 99.6                    | 99.0                      | 99.6                 | 99.4                   | 99.6                   | 99.2                        | 98.8                   | 99.2                 | 98.8                    | 98.8                   | 99.0                | 99.2                 | 99.2                | 96.4                  | 96.8                   | 97.1              | 95.6                 | 97.0                     | 95.6                |                       |      |
| [FJ439119] goose/41006 Taiwan/goose/2006                 | 98.1                 | 98.1                 | 99.9                      | 99.9                       | 99.9                 | 99.9                  | 99.9                 | 99.9                 | 99.9                          | 99.9               | 99.9                   | 99.9                   | 99.9                 | 99.9               | 99.9                  | 99.9                    | 99.7                    | 99.6                              | 99.9                    | 99.6                      | 99.9                 | 99.8                   | 99.9                   | 99.6                        | 99.2                   | 99.6                 | 99.2                    | 99.2                   | 99.4                | 99.6                 | 99.6                | 96.8                  | 97.2                   | 97.6              | 96.0                 | 97.4                     | 96.0                |                       |      |
| [KJ909530] SY1209 China/chicken/2012                     | 97.9                 | 97.9                 | 99.7                      | 99.7                       | 99.7                 | 99.7                  | 99.7                 | 99.7                 | 99.7                          | 99.7               | 99.7                   | 99.7                   | 99.7                 | 99.7               | 99.7                  | 99.7                    | 99.5                    | 99.8                              | 99.7                    | 99.8                      | 99.7                 | 99.8                   | 99.4                   | 99.2                        | 99.4                   | 99.0                 | 98.6                    | 99.0                   | 98.6                | 98.8                 | 99.0                | 96.2                  | 96.6                   | 96.9              | 95.4                 | 96.8                     | 95.4                |                       |      |
| [MW046296] KX19YLR1 China/chicken/2019                   | 98.1                 | 98.0                 | 99.8                      | 99.9                       | 99.9                 | 99.9                  | 99.9                 | 99.9                 | 99.9                          | 99.8               | 99.9                   | 99.9                   | 99.9                 | 99.9               | 99.9                  | 99.9                    | 99.7                    | 99.8                              | 99.8                    | 99.9                      | 99.7                 | 99.8                   | 99.9                   | 99.6                        | 99.2                   | 99.6                 | 99.2                    | 99.2                   | 99.4                | 99.6                 | 99.6                | 96.8                  | 97.2                   | 97.6              | 96.0                 | 97.4                     | 96.0                |                       |      |
| [KF305089] HA1101 China/chicken/2011                     | 98.1                 | 98.0                 | 99.8                      | 99.9                       | 99.9                 | 99.9                  | 99.9                 | 99.9                 | 99.9                          | 99.8               | 99.9                   | 99.9                   | 99.9                 | 99.9               | 99.9                  | 99.9                    | 99.7                    | 99.8                              | 99.8                    | 99.9                      | 99.7                 | 99.9                   | 99.8                   | 99.4                        | 99.0                   | 99.4                 | 99.0                    | 99.2                   | 99.4                | 99.6                 | 99.6                | 97.0                  | 97.4                   | 95.8              | 97.2                 | 95.8                     | 95.4                |                       |      |
| [FJ439120] chicken233705 Taiwan/goose/2006               | 98.1                 | 98.0                 | 99.8                      | 99.9                       | 99.9                 | 99.9                  | 99.9                 | 99.9                 | 99.9                          | 99.8               | 99.9                   | 99.9                   | 99.9                 | 99.9               | 99.9                  | 99.9                    | 99.7                    | 99.8                              | 99.8                    | 99.9                      | 99.7                 | 99.9                   | 99.8                   | 99.9                        | 99.6                   | 99.2                 | 99.6                    | 99.2                   | 99.2                | 99.4                 | 99.6                | 99.6                  | 96.8                   | 97.2              | 97.6                 | 96.0                     | 97.4                | 96.0                  |      |
| [MW046295] GX19NNR1 China/chicken/2019                   | 98.0                 | 97.9                 | 99.7                      | 99.8                       | 99.8                 | 99.8                  | 99.8                 | 99.8                 | 99.8                          | 99.7               | 99.8                   | 99.8                   | 99.8                 | 99.8               | 99.8                  | 99.8                    | 99.6                    | 99.9                              | 99.7                    | 99.9                      | 99.7                 | 99.8                   | 99.8                   | 99.8                        | 99.6                   | 99.2                 | 98.8                    | 98.8                   | 99.0                | 99.2                 | 99.2                | 96.4                  | 96.8                   | 97.1              | 95.6                 | 97.0                     | 95.6                |                       |      |
| [KJ909531] CY1111 China/chicken/2011                     | 97.9                 | 97.9                 | 99.7                      | 99.7                       | 99.7                 | 99.7                  | 99.7                 | 99.7                 | 99.7                          | 99.5               | 99.6                   | 99.6                   | 99.6                 | 99.6               | 99.6                  | 99.6                    | 99.4                    | 99.7                              | 99.5                    | 99.7                      | 99.5                 | 99.6                   | 99.6                   | 99.6                        | 99.8                   | 99.6                 | 99.2                    | 99.2                   | 99.2                | 99.4                 | 99.2                | 96.4                  | 96.8                   | 97.1              | 95.6                 | 97.0                     | 95.2                |                       |      |
| [KY581581] HB2015021 China/chicken/2015                  | 98.1                 | 98.0                 | 99.8                      | 99.9                       | 99.9                 | 99.9                  | 99.9                 | 99.9                 | 99.9                          | 99.7               | 99.7                   | 99.7                   | 99.7                 | 99.7               | 99.7                  | 99.7                    | 99.5                    | 99.8                              | 99.7                    | 99.8                      | 99.6                 | 99.7                   | 99.7                   | 99.7                        | 99.7                   | 99.7                 | 99.6                    | 99.6                   | 99.8                | 99.6                 | 99.6                | 96.8                  | 97.2                   | 97.6              | 96.0                 | 97.4                     | 96.0                |                       |      |
| [MW046297] KX18NNR1 China/chicken/2019                   | 97.8                 | 97.7                 | 99.5                      | 99.6                       | 99.6                 | 99.6                  | 99.6                 | 99.6                 | 99.6                          | 99.4               | 99.5                   | 99.5                   | 99.5                 | 99.5               | 99.5                  | 99.5                    | 99.3                    | 99.5                              | 99.4                    | 99.5                      | 99.3                 | 99.5                   | 99.5                   | 99.5                        | 99.4                   | 99.5                 | 99.6                    | 99.6                   | 99.2                | 99.2                 | 96.4                | 96.8                  | 97.1                   | 95.6              | 97.0                 | 95.2                     |                     |                       |      |
| [JQ804915] 1105 China/muscovy duck/2011                  | 97.9                 | 97.9                 | 99.7                      | 99.7                       | 99.7                 | 99.7                  | 99.7                 | 99.7                 | 99.7                          | 99.5               | 99.6                   | 99.6                   | 99.6                 | 99.6               | 99.6                  | 99.6                    | 99.4                    | 99.7                              | 99.5                    | 99.7                      | 99.5                 | 99.6                   | 99.6                   | 99.6                        | 99.5                   | 99.6                 | 99.7                    | 99.6                   | 99.6                | 99.2                 | 99.2                | 96.4                  | 96.8                   | 97.4              | 95.6                 | 97.0                     | 95.6                |                       |      |
| [MW046294] GD20R1 China/chicken/2020                     | 98.1                 | 98.1                 | 99.7                      | 99.8                       | 99.8                 | 99.8                  | 99.8                 | 99.8                 | 99.8                          | 99.6               | 99.7                   | 99.7                   | 99.7                 | 99.7               | 99.7                  | 99.7                    | 99.5                    | 99.7                              | 99.6                    | 99.7                      | 99.5                 | 99.7                   | 99.7                   | 99.6                        | 99.7                   | 99.8                 | 99.5                    | 99.7                   | 99.8                | 99.5                 | 99.7                | 99.4                  | 99.4                   | 96.8              | 97.2                 | 97.6                     | 96.0                | 97.4                  | 96.0 |
| [AF246698] IL-74/chicken/1972                            | 98.3                 | 98.2                 | 99.9                      | 99.9                       | 99.9                 | 99.9                  | 99.9                 | 99.9                 | 99.9                          | 99.7               | 99.8                   | 99.8                   | 99.8                 | 99.8               | 99.8                  | 99.8                    | 99.6                    | 99.9                              | 99.7                    | 99.9                      | 99.7                 | 99.8                   | 99.8                   | 99.8                        | 99.7                   | 99.7                 | 99.8                    | 99.5                   | 99.7                | 99.7                 | 99.9                | 99.7                  | 97.2                   | 97.6              | 98.0                 | 96.4                     | 97.8                | 96.0                  |      |
| [OK631657] USP-586 BZL/chicken/2014                      | 99.3                 | 99.2                 | 99.9                      | 99.9                       | 99.9                 | 99.9                  | 99.9                 | 99.9                 | 99.9                          | 99.7               | 99.8                   | 99.8                   | 99.8                 | 99.8               | 9                     |                         |                         |                                   |                         |                           |                      |                        |                        |                             |                        |                      |                         |                        |                     |                      |                     |                       |                        |                   |                      |                          |                     |                       |      |

<sup>1</sup> Nucleotides comparison are below the diagonal line.

<sup>2</sup> Deduced amino acids comparison are above the diagonal line.

**Table S6.** Pairwise identity matrix of nucleotides<sup>1</sup> and deduced amino acids<sup>2</sup> for the *pol* gene of the compared strains of REV.

|                                                          | [MG471384]<br>BJ1503 | [AY842951]<br>HA9901 | [MH709124]<br>FWPV-MN00.2 | [KY498002]<br>Ind/Guj-2011 | [KJ756349]<br>104865 | [DQ387450]<br>APC-566 | [OK631658]<br>USP-976 | [MW142017]<br>FWPV-S | [MH734528]<br>FWPV-SD15-670.2 | [MZ833509]<br>TB01 | [KU204702]<br>GDBL1401 | [KU204703]<br>GDBL1402 | [KU641115]<br>LN1201 | [JX912710]<br>MD-2 | [GQ415646]<br>HLJR0901 | [MT138121]<br>gps222ret1 | [MN812764]<br>CH-GD2019 | [MF631845]<br>REV-TH/CB/2013/CU-1 | [MT138120]<br>cat223ret1 | [FJ439119]<br>goose/3410/06 | [KJ909530]<br>SY1209 | [MW046296]<br>GX19YLR1 | [KF305089]<br>HA1101 | [FJ439120]<br>chicken/3337/05 | [MW046295]<br>GX19NNR1 | [KJ909531]<br>CY1111 | [KY581581]<br>HB2015021 | [MW046297]<br>GX18NNR1 | [JQ804915]<br>1105 | [MW046294]<br>GD20R1 | [AF246698]<br>IL-74 | [OK631657]<br>USP-586 | [MF185397]<br>SDAUR-S1 | [DQ003591]<br>SNV | [KF709431]<br>GD1210 | [KF313137]<br>ATCC-VR775 | [GQ375848]<br>HLJ071 | [KX278301]<br>IBD-C1605 |      |      |      |
|----------------------------------------------------------|----------------------|----------------------|---------------------------|----------------------------|----------------------|-----------------------|-----------------------|----------------------|-------------------------------|--------------------|------------------------|------------------------|----------------------|--------------------|------------------------|--------------------------|-------------------------|-----------------------------------|--------------------------|-----------------------------|----------------------|------------------------|----------------------|-------------------------------|------------------------|----------------------|-------------------------|------------------------|--------------------|----------------------|---------------------|-----------------------|------------------------|-------------------|----------------------|--------------------------|----------------------|-------------------------|------|------|------|
| [MG471384] BJ1503 China/chicken/2015                     |                      | 99.5                 | 98.9                      | 99.0                       | 99.0                 | 99.0                  | 99.0                  | 99.0                 | 99.0                          | 98.1               | 98.7                   | 98.9                   | 99.0                 | 98.9               | 99.0                   | 98.9                     | 98.7                    | 99.0                              | 98.9                     | 98.9                        | 98.8                 | 99.0                   | 98.9                 | 98.5                          | 98.9                   | 98.4                 | 98.8                    | 98.8                   | 98.9               | 98.9                 | 99.0                | 96.7                  | 97.1                   | 97.4              | 97.0                 | 98.5                     | 97.4                 |                         |      |      |      |
| [AY842951] HA9901 China/chicken/1999                     | 99.7                 |                      | 98.4                      | 98.4                       | 98.4                 | 98.4                  | 98.4                  | 98.4                 | 98.4                          | 97.6               | 98.2                   | 98.4                   | 98.4                 | 98.4               | 98.4                   | 98.4                     | 98.2                    | 98.4                              | 98.4                     | 98.4                        | 98.4                 | 98.3                   | 98.4                 | 98.4                          | 98.0                   | 98.4                 | 97.9                    | 98.3                   | 98.4               | 98.4                 | 98.4                | 96.2                  | 96.6                   | 96.9              | 96.4                 | 98.0                     | 96.9                 |                         |      |      |      |
| [MH709124] FWPV-MN00.2 USA/chicken/2000                  | 98.4                 | 98.3                 |                           | 99.9                       | 99.9                 | 99.9                  | 99.9                  | 99.9                 | 99.9                          | 99.0               | 99.7                   | 98.8                   | 99.9                 | 99.9               | 99.9                   | 99.9                     | 99.7                    | 99.9                              | 99.9                     | 99.9                        | 99.9                 | 99.9                   | 99.9                 | 99.9                          | 99.5                   | 99.8                 | 99.4                    | 99.7                   | 99.7               | 99.8                 | 99.8                | 99.9                  | 97.3                   | 97.7              | 98.0                 | 97.6                     | 99.5                 | 98.0                    |      |      |      |
| [KY498002] Ind/Guj-2011 India/poultry/2011               | 98.4                 | 98.3                 | 99.9                      |                            | 99.9                 | 99.9                  | 99.9                  | 99.9                 | 99.9                          | 99.1               | 99.7                   | 99.9                   | 99.9                 | 99.9               | 99.9                   | 99.9                     | 99.7                    | 99.9                              | 99.9                     | 99.9                        | 99.9                 | 99.9                   | 99.9                 | 99.9                          | 99.6                   | 99.9                 | 99.5                    | 99.8                   | 99.8               | 99.9                 | 99.9                | 99.9                  | 97.4                   | 97.8              | 98.1                 | 97.7                     | 99.6                 | 98.1                    |      |      |      |
| [KJ756349] 104865 USA/turkey/2014                        | 98.4                 | 98.3                 | 99.9                      | 99.9                       |                      | 99.9                  | 99.9                  | 99.9                 | 99.9                          | 99.1               | 99.7                   | 99.9                   | 99.9                 | 99.9               | 99.9                   | 99.9                     | 99.7                    | 99.9                              | 99.9                     | 99.9                        | 99.9                 | 99.9                   | 99.9                 | 99.9                          | 99.6                   | 99.9                 | 99.5                    | 99.8                   | 99.8               | 99.9                 | 99.9                | 99.9                  | 97.4                   | 97.8              | 98.1                 | 97.7                     | 99.6                 | 98.1                    |      |      |      |
| [DQ387450] APC-566 USA/prairie chicken/2005              | 98.4                 | 98.3                 | 99.9                      | 99.9                       | 99.9                 |                       | 99.9                  | 99.9                 | 99.9                          | 99.1               | 99.7                   | 99.9                   | 99.9                 | 99.9               | 99.9                   | 99.9                     | 99.7                    | 99.9                              | 99.9                     | 99.9                        | 99.9                 | 99.9                   | 99.9                 | 99.9                          | 99.6                   | 99.9                 | 99.5                    | 99.8                   | 99.8               | 99.9                 | 99.9                | 99.9                  | 97.4                   | 97.8              | 98.1                 | 97.7                     | 99.6                 | 98.1                    |      |      |      |
| [OK631658] USP-976 Brazil/chicken/2018                   | 98.4                 | 98.3                 | 99.9                      | 99.9                       | 99.9                 | 99.9                  |                       | 99.9                 | 99.9                          | 99.1               | 99.7                   | 99.9                   | 99.9                 | 99.9               | 99.9                   | 99.9                     | 99.7                    | 99.9                              | 99.9                     | 99.9                        | 99.9                 | 99.9                   | 99.9                 | 99.9                          | 99.6                   | 99.9                 | 99.5                    | 99.8                   | 99.8               | 99.9                 | 99.9                | 99.9                  | 97.4                   | 97.8              | 98.1                 | 97.7                     | 99.6                 | 98.1                    |      |      |      |
| [MW142017] FWPV-S Australia/vaccine/1997                 | 98.4                 | 98.3                 | 99.9                      | 99.9                       | 99.9                 | 99.9                  | 99.9                  |                      | 99.9                          | 99.1               | 99.7                   | 99.9                   | 99.9                 | 99.9               | 99.9                   | 99.9                     | 99.7                    | 99.9                              | 99.9                     | 99.9                        | 99.9                 | 99.9                   | 99.9                 | 99.9                          | 99.6                   | 99.9                 | 99.5                    | 99.8                   | 99.8               | 99.9                 | 99.9                | 99.9                  | 97.4                   | 97.8              | 98.1                 | 97.7                     | 99.6                 | 98.1                    |      |      |      |
| [MH734528] FWPV-SD15-670.2 USA/Merriams wild turkey/2015 | 98.4                 | 98.3                 | 99.9                      | 99.9                       | 99.9                 | 99.9                  | 99.9                  | 99.9                 |                               | 99.1               | 99.7                   | 99.9                   | 99.9                 | 99.9               | 99.9                   | 99.9                     | 99.7                    | 99.9                              | 99.9                     | 99.9                        | 99.9                 | 99.9                   | 99.9                 | 99.9                          | 99.6                   | 99.9                 | 99.5                    | 99.8                   | 99.8               | 99.9                 | 99.9                | 99.9                  | 97.4                   | 97.8              | 98.1                 | 97.7                     | 99.6                 | 98.1                    |      |      |      |
| [MZ833509] TB01 China/Tibetan chicken/2019               | 98.1                 | 97.9                 | 99.6                      | 99.6                       | 99.6                 | 99.6                  | 99.6                  | 99.6                 | 99.6                          |                    | 98.9                   | 99.0                   | 99.1                 | 99.0               | 99.1                   | 99.0                     | 98.9                    | 99.1                              | 99.0                     | 99.0                        | 99.0                 | 99.0                   | 99.1                 | 99.0                          | 98.7                   | 99.0                 | 98.6                    | 99.0                   | 99.0               | 99.0                 | 99.0                | 99.1                  | 96.5                   | 97.0              | 97.2                 | 96.8                     | 98.7                 | 97.2                    |      |      |      |
| [KU204702] GDBL1401 China/adult pigeon/2014              | 98.4                 | 98.2                 | 99.9                      | 99.9                       | 99.9                 | 99.9                  | 99.9                  | 99.9                 | 99.9                          | 99.5               |                        | 98.8                   | 99.7                 | 98.9               | 98.7                   | 98.7                     | 99.5                    | 99.7                              | 99.7                     | 99.7                        | 99.7                 | 99.7                   | 99.7                 | 99.3                          | 99.7                   | 99.2                 | 99.6                    | 99.6                   | 99.7               | 99.7                 | 99.7                | 97.1                  | 97.6                   | 97.8              | 97.5                 | 99.3                     | 97.8                 |                         |      |      |      |
| [KU204703] GDBL1402 China/young pigeon/2014              | 98.4                 | 98.3                 | 99.9                      | 99.9                       | 99.9                 | 99.9                  | 99.9                  | 99.9                 | 99.9                          | 99.9               | 99.9                   |                        | 99.9                 | 99.9               | 99.9                   | 99.9                     | 99.8                    | 99.7                              | 99.9                     | 99.8                        | 99.8                 | 99.7                   | 99.9                 | 99.9                          | 99.5                   | 99.8                 | 99.4                    | 99.7                   | 99.7               | 99.8                 | 99.8                | 99.9                  | 97.3                   | 97.7              | 98.0                 | 97.7                     | 99.5                 | 98.0                    |      |      |      |
| [KU641115] LN1201 China/chicken/2012                     | 98.4                 | 98.3                 | 99.9                      | 99.9                       | 99.9                 | 99.9                  | 99.9                  | 99.9                 | 99.9                          | 99.6               | 99.9                   | 99.9                   |                      | 99.9               | 99.9                   | 99.9                     | 99.9                    | 99.7                              | 99.9                     | 99.9                        | 99.9                 | 99.9                   | 99.9                 | 99.9                          | 99.6                   | 99.9                 | 99.5                    | 99.8                   | 99.8               | 99.9                 | 99.9                | 99.9                  | 97.3                   | 97.7              | 98.0                 | 97.7                     | 99.5                 | 98.1                    |      |      |      |
| [JX912710] MD-2 China/HVT vaccine/2007                   | 98.4                 | 98.3                 | 99.9                      | 99.9                       | 99.9                 | 99.9                  | 99.9                  | 99.9                 | 99.9                          | 99.6               | 99.9                   | 99.9                   | 99.9                 |                    | 99.9                   | 99.9                     | 99.9                    | 99.8                              | 99.8                     | 99.8                        | 99.8                 | 99.7                   | 99.9                 | 99.9                          | 99.5                   | 99.8                 | 99.4                    | 99.7                   | 99.7               | 99.8                 | 99.8                | 99.9                  | 97.3                   | 97.7              | 98.0                 | 97.7                     | 99.5                 | 98.0                    |      |      |      |
| [GQ415646] HLJR0901 China/chicken/2009                   | 98.4                 | 98.3                 | 99.9                      | 99.9                       | 99.9                 | 99.9                  | 99.9                  | 99.9                 | 99.9                          | 99.9               | 99.9                   | 99.9                   | 99.9                 | 99.9               |                        | 99.9                     | 99.7                    | 99.9                              | 99.9                     | 99.9                        | 99.9                 | 99.9                   | 99.9                 | 99.9                          | 99.6                   | 99.9                 | 99.5                    | 99.8                   | 99.8               | 99.9                 | 99.9                | 99.9                  | 97.3                   | 97.7              | 98.0                 | 97.7                     | 99.5                 | 98.1                    |      |      |      |
| [MT138121] gps222ret1 China/Cabots tragopan/2018         | 98.4                 | 98.3                 | 99.9                      | 99.9                       | 99.9                 | 99.9                  | 99.9                  | 99.9                 | 99.9                          | 99.6               | 99.9                   | 99.9                   | 99.9                 | 99.9               | 99.9                   |                          | 99.7                    | 99.9                              | 99.8                     | 99.8                        | 99.8                 | 99.7                   | 99.9                 | 99.8                          | 99.5                   | 99.8                 | 99.4                    | 99.7                   | 99.7               | 99.8                 | 99.8                | 99.9                  | 97.2                   | 97.7              | 98.0                 | 97.6                     | 99.5                 | 98.0                    |      |      |      |
| [MN812764] CH-GD2019 China/duck/2019                     | 98.3                 | 98.1                 | 99.8                      | 99.9                       | 99.9                 | 99.9                  | 99.9                  | 99.9                 | 99.9                          | 99.5               | 99.8                   | 99.8                   | 99.9                 | 99.9               | 99.9                   | 99.9                     |                         | 99.7                              | 99.7                     | 99.7                        | 99.7                 | 99.6                   | 99.7                 | 99.7                          | 99.3                   | 99.7                 | 99.2                    | 99.6                   | 99.6               | 99.7                 | 99.7                | 99.9                  | 97.3                   | 97.7              | 97.9                 | 97.5                     | 99.3                 | 97.9                    |      |      |      |
| [MF631845] REV-TH/CB/2013/CU-1 Thailand/chicken/2013     | 98.4                 | 98.3                 | 99.9                      | 99.9                       | 99.9                 | 99.9                  | 99.9                  | 99.9                 | 99.9                          | 99.6               | 99.9                   | 99.9                   | 99.9                 | 99.9               | 99.9                   | 99.9                     | 99.9                    |                                   | 99.9                     | 99.9                        | 99.9                 | 99.8                   | 99.9                 | 99.9                          | 99.6                   | 99.9                 | 99.5                    | 99.8                   | 99.8               | 99.9                 | 99.9                | 99.9                  | 97.4                   | 97.8              | 98.1                 | 97.7                     | 99.6                 | 98.1                    |      |      |      |
| [MT138120] cat223ret1 China/Cabots tragopan/2018         | 98.4                 | 98.2                 | 99.9                      | 99.9                       | 99.9                 | 99.9                  | 99.9                  | 99.9                 | 99.9                          | 99.6               | 99.9                   | 99.9                   | 99.9                 | 99.9               | 99.9                   | 99.9                     | 99.8                    | 99.9                              |                          | 99.9                        | 99.9                 | 99.8                   | 99.7                 | 99.9                          | 99.8                   | 99.5                 | 99.8                    | 99.4                   | 99.7               | 99.7                 | 99.8                | 99.8                  | 99.9                   | 97.3              | 97.7                 | 98.0                     | 97.6                 | 99.5                    | 98.0 |      |      |
| [FJ439119] goose/3410/06 Taiwan/goose/2006               | 98.4                 | 98.2                 | 99.9                      | 99.9                       | 99.9                 | 99.9                  | 99.9                  | 99.9                 | 99.9                          | 99.6               | 99.9                   | 99.9                   | 99.9                 | 99.9               | 99.9                   | 99.9                     | 99.8                    | 99.9                              | 99.9                     |                             | 99.9                 | 99.8                   | 99.8                 | 99.7                          | 99.9                   | 99.8                 | 99.5                    | 99.8                   | 99.4               | 99.7                 | 99.7                | 99.8                  | 99.8                   | 99.9              | 97.3                 | 97.7                     | 98.0                 | 97.6                    | 99.5 | 98.0 |      |
| [KJ909530] SY1209 China/chicken/2012                     | 98.4                 | 98.2                 | 99.9                      | 99.9                       | 99.9                 | 99.9                  | 99.9                  | 99.9                 | 99.9                          | 99.5               | 99.8                   | 99.9                   | 99.9                 | 99.9               | 99.9                   | 99.9                     | 99.8                    | 99.9                              | 99.9                     | 99.9                        |                      | 99.8                   | 99.8                 | 99.7                          | 99.9                   | 99.8                 | 99.5                    | 99.8                   | 99.4               | 99.7                 | 99.7                | 99.8                  | 99.8                   | 99.9              | 97.3                 | 97.7                     | 98.0                 | 97.6                    | 99.5 | 98.0 |      |
| [MW046296] GX19YLR1 China/chicken/2019                   | 98.4                 | 98.2                 | 99.9                      | 99.9                       | 99.9                 | 99.9                  | 99.9                  | 99.9                 | 99.9                          | 99.5               | 99.8                   | 99.9                   | 99.9                 | 99.9               | 99.9                   | 99.9                     | 99.8                    | 99.9                              | 99.9                     | 99.9                        | 99.9                 |                        | 99.8                 | 99.7                          | 99.4                   | 99.7                 | 99.5                    | 99.8                   | 99.7               | 99.7                 | 99.7                | 99.7                  | 99.8                   | 99.8              | 99.9                 | 97.2                     | 97.7                 | 97.9                    | 97.5 | 99.4 | 97.9 |
| [KF305089] HA1101 China/chicken/2011                     | 98.4                 | 98.3                 | 99.9                      | 99.9                       | 99.9                 | 99.9                  | 99.9                  | 99.9                 | 99.9                          | 99.6               | 99.9                   | 99.9                   | 99.9                 | 99.9               | 99.9                   | 99.9                     | 99.9                    | 99.9                              | 99.9                     | 99.9                        | 99.9                 | 99.9                   |                      | 99.9                          | 99.6                   | 99.9                 | 99.5                    | 99.8                   | 99.8               | 99.9                 | 99.9                | 99.9                  | 99.9                   | 97.4              | 97.8                 | 98.1                     | 97.7                 | 99.6                    | 98.1 |      |      |
| [FJ439120] chicken/3337/05 Taiwan/chicken/2005           | 98.4                 | 98.2                 | 99.9                      | 99.9                       | 99.9                 | 99.9                  | 99.9                  | 99.9                 | 99.9                          | 99.5               | 99.8                   | 99.9                   | 99.9                 | 99.9               | 99.9                   | 99.9                     | 99.8                    | 99.9                              | 99.9                     | 99.8                        | 99.8                 | 99.9                   | 99.9                 | 99.9                          | 99.5                   | 99.8                 | 99.4                    | 99.7                   | 99.7               | 99.8                 | 99.8                | 99.9                  | 97.3                   | 97.7              | 98.0                 | 97.6                     | 99.5                 | 98.0                    |      |      |      |
| [MW046295] GX19NNR1 China/chicken/2019                   | 98.2                 | 98.1                 | 99.8                      | 99.8                       | 99.8                 | 99.8                  | 99.8                  | 99.8                 | 99.8                          | 99.4               | 99.7                   | 99.8                   | 99.8                 | 99.8               | 99.8                   | 99.8                     | 99.7                    | 99.8                              | 99.7                     | 99.7                        | 99.8                 | 99.7                   | 99.9                 | 99.8                          | 99.5                   | 99.8                 | 99.4                    | 99.7                   | 99.7               | 99.8                 | 99.8                | 99.9                  | 97.0                   | 97.4              | 97.7                 | 97.2                     | 99.1                 | 97.7                    |      |      |      |
| [KJ909531] CY1111 China/chicken/2011                     | 98.4                 | 98.3                 | 99.9                      | 99.9                       | 99.9                 | 99.9                  | 99.9                  | 99.9                 | 99.9                          | 99.6               | 99.9                   | 99.9                   | 99.9                 | 99.9               | 99.9                   | 99.9                     | 99.9                    | 99.9                              | 99.9                     | 99.9                        | 99.9                 | 99.9                   | 99.9                 | 99.8                          | 99.9                   | 99.5                 | 99.8                    | 99.4                   | 99.7               | 99.7                 | 99.8                | 99.8                  | 99.9                   | 97.4              | 97.7                 | 98.0                     | 97.6                 | 99.5                    | 98.0 |      |      |
| [KY581581] HB2015021 China/chicken/2015                  | 98.2                 | 98.0                 | 99.7                      | 99.7                       | 99.7                 | 99.7                  | 99.7                  | 99.7                 | 99.7                          | 99.4               | 99.7                   | 99.7                   | 99.7                 | 99.7               | 99.7                   | 99.7                     | 99.6                    | 99.7                              | 99.7                     | 99.7                        | 99.7                 | 99.7                   | 99.7                 | 99.5                          | 99.7                   | 99.3                 | 99.3                    | 99.4                   | 99.4               | 99.4                 | 99.4                | 99.5                  | 96.9                   | 97.3              | 97.6                 | 97.1                     | 99.0                 | 97.6                    |      |      |      |
| [MW046297] GX18NNR1 China/chicken/2018                   | 98.3                 | 98.1                 | 99.8                      | 99.9                       | 99.9                 | 99.9                  | 99.9                  | 99.9                 | 99.9                          | 99.5               | 99.8                   | 99.8                   | 99.9                 | 99.8               | 99.8                   | 99.8                     | 99.7                    | 99.9                              | 99.8                     | 99.8                        | 99.8                 | 99.9                   | 99.8                 | 99.7                          | 99.7                   | 99.8                 | 99.6                    | 99.7                   | 99.7               | 99.7                 | 99.7                | 99.8                  | 99.8                   | 99.9              | 97.2                 | 97.7                     | 97.9                 | 97.5                    | 99.4 | 97.9 |      |
| [JQ804915] 1105 China/muscovy duck/2011                  | 98.4                 | 98.2                 | 99.9                      | 99.9                       | 99.9                 | 99.9                  | 99.9                  | 99.9                 | 99.9                          | 99.5               | 99.8                   | 99.9                   | 99.9                 | 99.9               | 99.9                   | 99.9                     | 99.7                    | 99.9                              | 99.8                     | 99.8                        | 99.8                 | 99.9                   | 99.8                 | 99.7                          | 99.7                   | 99.8                 | 99.6                    | 99.7                   | 99.7               | 99.7                 | 99.7                | 99.8                  | 99.8                   | 99.9              | 97.2                 | 97.7                     | 97.9                 | 97.5                    | 99.4 | 97.9 |      |
| [MW046294] GD20R1 China/chicken/2020                     | 98.4                 | 98.2                 | 99.9                      | 99.9                       | 99.9                 | 99.9                  | 99.9                  | 99.9                 | 99.9                          | 99.5               | 99.8                   | 99.9                   | 99.9                 | 99.9               | 99.9                   | 99.9                     | 99.8                    | 99.9                              | 99.9                     | 99.8                        | 99.8                 | 99.9                   | 99.8                 | 99.8                          | 99.8                   | 99.9                 | 99.7                    | 99.8                   | 99.8               | 99.8                 | 99.8                | 99.9                  | 97.3                   | 97.7              | 98.0                 | 97.6                     | 99.5                 | 98.0                    |      |      |      |
| [AF246698] IL-74/chicken/1972                            | 98.4                 | 98.3                 | 99.9                      | 99.9                       | 99.9                 | 99.9                  |                       |                      |                               |                    |                        |                        |                      |                    |                        |                          |                         |                                   |                          |                             |                      |                        |                      |                               |                        |                      |                         |                        |                    |                      |                     |                       |                        |                   |                      |                          |                      |                         |      |      |      |



**Table S7.** Pairwise identity matrix of nucleotides<sup>1</sup> and deduced amino acids<sup>2</sup> for the *env* gene of the compared strains of REV.

|                                                          | [MG471384]<br>BJ1503 | [AY842951]<br>HA9901 | [MH709124]<br>FWPV-MN00.2 | [KJ498002]<br>Ind/Guj-2011 | [KJ756349]<br>104865 | [DQ387450]<br>APC-566 | [OK631658]<br>USP-976 | [ML142017]<br>FWPV-S | [MH734528]<br>FWPV-SD15-670.2 | [MZ833509]<br>TB01 | [KU204702]<br>GDBL401 | [KU204703]<br>GDBL402 | [KU641115]<br>LN1201 | [XJ912710]<br>MD-2 | [GQ415646]<br>HLJR0901 | [ML138121]<br>gps222ref1 | [MN812764]<br>CH-GD2019 | [MF831845]<br>REV-THC/B2013CU-1 | [ML138120]<br>cat223ref1 | [FJ439119]<br>goose/34/10/06 | [KJ909530]<br>SY1209 | [MW046296]<br>GX191LK1 | [KF305089]<br>HA1101 | [FJ439120]<br>chicken/3337/05 | [MW046295]<br>GX19NNR1 | [KJ909531]<br>CY1111 | [KY581581]<br>HB2015021 | [MW046297]<br>GX18NNR1 | [GX0804915]<br>1105 | [MW046294]<br>GD20R1 | [GX246698]<br>IL-74 | [OK631657]<br>USP-586 | [MF185397]<br>SDAUR-S1 | [DQ003591]<br>SNV | [KF709431]<br>GD1210 | [KF313137]<br>ATCC-VR775 | [GX375848]<br>HLJ071 | [KX278301]<br>IBD-C1605 |      |
|----------------------------------------------------------|----------------------|----------------------|---------------------------|----------------------------|----------------------|-----------------------|-----------------------|----------------------|-------------------------------|--------------------|-----------------------|-----------------------|----------------------|--------------------|------------------------|--------------------------|-------------------------|---------------------------------|--------------------------|------------------------------|----------------------|------------------------|----------------------|-------------------------------|------------------------|----------------------|-------------------------|------------------------|---------------------|----------------------|---------------------|-----------------------|------------------------|-------------------|----------------------|--------------------------|----------------------|-------------------------|------|
| [MG471384] BJ1503 China/chicken/2015                     | 99.8                 | 99.7                 | 95.5                      | 95.7                       | 95.7                 | 95.5                  | 95.4                  | 95.7                 | 95.7                          | 94.7               | 95                    | 95                    | 95.5                 | 95.4               | 95.5                   | 95.5                     | 95                      | 95.5                            | 95.2                     | 95.5                         | 95.4                 | 95.5                   | 95.4                 | 95.2                          | 95.5                   | 95.5                 | 95.5                    | 95.4                   | 95.5                | 95.5                 | 95.2                | 95.7                  | 92.3                   | 92.3              | 92                   | 91.6                     | 95                   | 91.6                    |      |
| [AY842951] HA9901 China/chicken/1999                     | 99.8                 | 95.6                 | 95.1                      | 96.1                       | 95.9                 | 95.7                  | 96.1                  | 95.7                 | 96.1                          | 95                 | 95.4                  | 95.4                  | 95.4                 | 95.5               | 95.9                   | 95.4                     | 95.5                    | 95.5                            | 95.5                     | 95.9                         | 95.4                 | 95.5                   | 95.5                 | 95.5                          | 95.5                   | 95.5                 | 95.4                    | 95.5                   | 95.5                | 95.2                 | 96.1                | 96.1                  | 92.5                   | 92.5              | 92.1                 | 91.8                     | 95.4                 | 91.8                    |      |
| [MH709124] FWPV-MN00.2 USA/chicken/2000                  | 97.5                 | 97.6                 |                           | 99.8                       | 99.8                 | 99.7                  | 99.5                  | 99.8                 | 99.8                          | 98.6               | 99.1                  | 99.1                  | 99.7                 | 99.5               | 99.7                   | 99.7                     | 99.1                    | 99.7                            | 99.3                     | 99.7                         | 99.5                 | 99.7                   | 99.3                 | 99.7                          | 99.3                   | 99.7                 | 99.1                    | 99.7                   | 99.7                | 99.3                 | 99.8                | 99.8                  | 95.1                   | 95.1              | 94.7                 | 94.5                     | 99.1                 | 94.4                    |      |
| [KY498002] Ind/Guj-2011 India/poultry/2011               | 97.6                 | 97.7                 | 99.9                      | 99.9                       | 99.9                 | 99.8                  | 99.7                  | 99.9                 | 99.9                          | 99.8               | 99.3                  | 99.3                  | 99.8                 | 99.7               | 99.8                   | 99.8                     | 99.3                    | 99.8                            | 99.5                     | 99.8                         | 99.7                 | 99.8                   | 99.5                 | 99.8                          | 99.5                   | 99.8                 | 99.3                    | 99.8                   | 99.8                | 99.5                 | 99.9                | 99.9                  | 95.2                   | 95.2              | 94.9                 | 94.7                     | 99.3                 | 94.5                    |      |
| [KJ756349] 104865 USA/turkey/2014                        | 97.6                 | 97.7                 | 99.9                      | 99.9                       |                      | 99.8                  | 99.7                  | 99.9                 | 99.9                          | 99.8               | 99.3                  | 99.3                  | 99.8                 | 99.8               | 99.7                   | 99.8                     | 99.8                    | 99.3                            | 99.8                     | 99.5                         | 99.8                 | 99.7                   | 99.8                 | 99.5                          | 99.8                   | 99.5                 | 99.8                    | 99.3                   | 99.8                | 99.8                 | 99.5                | 99.9                  | 99.9                   | 95.2              | 95.2                 | 94.9                     | 94.7                 | 99.3                    | 94.5 |
| [DQ387450] APC-566 USA/prairie chicken/2005              | 97.5                 | 97.6                 | 99.9                      | 99.9                       | 99.9                 |                       | 99.5                  | 99.8                 | 99.8                          | 98.6               | 99.1                  | 99.1                  | 99.7                 | 99.5               | 99.7                   | 99.7                     | 99.1                    | 99.7                            | 99.3                     | 99.7                         | 99.5                 | 99.7                   | 99.8                 | 99.5                          | 99.8                   | 99.3                 | 99.8                    | 99.8                   | 99.5                | 99.9                 | 99.9                | 95.1                  | 95.1                   | 94.7              | 94.5                 | 99.1                     | 94.5                 |                         |      |
| [OK631658] USP-976 Brazil/chicken/2018                   | 97.5                 | 97.5                 | 99.8                      | 99.9                       | 99.9                 | 99.8                  |                       | 99.7                 | 99.7                          | 99.8               | 99.3                  | 99.3                  | 99.8                 | 99.7               | 99.8                   | 99.8                     | 99.3                    | 99.8                            | 99.5                     | 99.8                         | 99.7                 | 99.8                   | 99.5                 | 99.8                          | 99.5                   | 99.8                 | 99.3                    | 99.8                   | 99.8                | 99.5                 | 99.7                | 99.7                  | 94.9                   | 94.9              | 94.5                 | 94.4                     | 99.3                 | 94.2                    |      |
| [MW142017] FWPV-S Australia/vaccine/1997                 | 97.6                 | 97.7                 | 99.9                      | 99.9                       | 99.9                 | 99.9                  |                       | 99.9                 |                               | 99.8               | 99.3                  | 99.3                  | 99.8                 | 99.7               | 99.8                   | 99.8                     | 99.3                    | 99.8                            | 99.5                     | 99.8                         | 99.7                 | 99.8                   | 99.5                 | 99.8                          | 99.5                   | 99.8                 | 99.3                    | 99.8                   | 99.8                | 99.5                 | 99.9                | 99.9                  | 95.2                   | 95.2              | 94.9                 | 94.7                     | 99.3                 | 94.5                    |      |
| [MH734528] FWPV-SD15-670.2 USA/Merriams wild turkey/2015 | 97.6                 | 97.7                 | 99.9                      | 99.9                       | 99.9                 | 99.9                  | 99.9                  | 99.9                 |                               | 99.8               | 99.3                  | 99.3                  | 99.8                 | 99.7               | 99.8                   | 99.8                     | 99.3                    | 99.8                            | 99.5                     | 99.8                         | 99.5                 | 99.8                   | 99.7                 | 99.8                          | 99.5                   | 99.8                 | 99.3                    | 99.8                   | 99.8                | 99.5                 | 99.9                | 99.9                  | 95.2                   | 95.2              | 94.9                 | 94.7                     | 99.3                 | 94.5                    |      |
| [MZ833509] TB01                                          | 97.1                 | 97.2                 | 99.4                      | 99.4                       | 99.4                 | 99.4                  | 99.4                  | 99.4                 | 99.4                          | 99.4               |                       |                       | 98.5                 | 98.5               | 99                     | 98.8                     | 99                      | 98.5                            | 99                       | 98.6                         | 99                   | 98.8                   | 99                   | 98.6                          | 99                     | 98.6                 | 99                      | 98.6                   | 99                  | 98.6                 | 98.8                | 98.8                  | 94.5                   | 94.2              | 93.7                 | 98.5                     | 93.9                 |                         |      |
| [KU204702] GDBL401 China/adult pigeon/2014               | 97.4                 | 97.4                 | 99.7                      | 99.8                       | 99.8                 | 99.7                  | 99.8                  | 99.8                 | 99.8                          | 99.3               |                       |                       | 99.9                 | 99.5               | 99.7                   | 99.5                     | 99.5                    | 99                              | 99.5                     | 99.7                         | 99.5                 | 99.3                   | 99.5                 | 99.1                          | 99.5                   | 99.1                 | 99.5                    | 99                     | 99.5                | 99.5                 | 99.1                | 99.3                  | 99.3                   | 94.5              | 94.5                 | 94.2                     | 94                   | 99                      | 93.9 |
| [KU204703] GDBL402 China/young pigeon/2014               | 97.4                 | 97.4                 | 99.7                      | 99.8                       | 99.8                 | 99.7                  | 99.8                  | 99.8                 | 99.8                          | 99.3               | 99.9                  |                       |                      | 99.5               | 99.7                   | 99.5                     | 99.5                    | 99                              | 99.5                     | 99.7                         | 99.5                 | 99.3                   | 99.5                 | 99.1                          | 99.5                   | 99.1                 | 99.5                    | 99                     | 99.5                | 99.5                 | 99.1                | 99.3                  | 99.3                   | 94.5              | 94.5                 | 94.2                     | 94                   | 99                      | 93.9 |
| [KU641115] LN1201 China/chicken/2012                     | 97.5                 | 97.6                 | 99.9                      | 99.9                       | 99.9                 | 99.9                  | 99.9                  | 99.9                 | 99.9                          | 99.5               | 99.8                  | 99.8                  |                      | 99.8               | 99.9                   | 99.9                     | 99.5                    | 99.9                            | 99.7                     | 99.9                         | 99.8                 | 99.9                   | 99.7                 | 99.9                          | 99.7                   | 99.9                 | 99.5                    | 99.9                   | 99.9                | 99.7                 | 99.8                | 99.8                  | 95.1                   | 95.1              | 94.7                 | 94.5                     | 99.5                 | 94.4                    |      |
| [XJ912710] MD-2 China/HVT vaccine/2010                   | 97.5                 | 97.5                 | 99.8                      | 99.9                       | 99.9                 | 99.8                  | 99.9                  | 99.9                 | 99.9                          | 99.9               | 99.4                  | 99.9                  | 99.9                 |                    | 99.8                   | 99.8                     | 99.3                    | 99.8                            | 99.5                     | 99.8                         | 99.7                 | 99.8                   | 99.5                 | 99.8                          | 99.5                   | 99.8                 | 99.3                    | 99.8                   | 99.8                | 99.5                 | 99.7                | 99.7                  | 94.9                   | 94.9              | 94.5                 | 94.4                     | 99.3                 | 94.2                    |      |
| [GQ415646] HLJR0901 China/chicken/2009                   | 97.4                 | 97.5                 | 99.8                      | 99.8                       | 99.8                 | 99.8                  | 99.8                  | 99.8                 | 99.8                          | 99.4               | 99.7                  | 99.7                  | 99.8                 | 99.8               |                        | 99.9                     | 99.5                    | 99.9                            | 99.7                     | 99.9                         | 99.8                 | 99.9                   | 99.7                 | 99.9                          | 99.7                   | 99.9                 | 99.5                    | 99.9                   | 99.9                | 99.7                 | 99.8                | 99.8                  | 95.1                   | 95.1              | 94.7                 | 94.5                     | 99.5                 | 94.4                    |      |
| [MT138121] gps222ref1 China/Cabots tragopan/2018         | 97.5                 | 97.6                 | 99.9                      | 99.9                       | 99.9                 | 99.9                  | 99.9                  | 99.9                 | 99.9                          | 99.5               | 99.8                  | 99.8                  | 99.9                 | 99.9               | 99.9                   |                          | 99.5                    | 99.9                            | 99.7                     | 99.9                         | 99.8                 | 99.9                   | 99.7                 | 99.9                          | 99.7                   | 99.9                 | 99.5                    | 99.9                   | 99.9                | 99.7                 | 99.8                | 99.8                  | 95.1                   | 95.1              | 94.7                 | 94.5                     | 99.5                 | 94.4                    |      |
| [MN812764] CH-GD2019 China/cuckoo-1                      | 97.4                 | 97.4                 | 99.7                      | 99.8                       | 99.8                 | 99.7                  | 99.8                  | 99.8                 | 99.8                          | 99.3               | 99.7                  | 99.7                  | 99.8                 | 99.8               | 99.7                   | 99.8                     |                         | 99.5                            | 99.1                     | 99.5                         | 99.3                 | 99.5                   | 99.1                 | 99.5                          | 99.1                   | 99.5                 | 99                      | 99.5                   | 99.5                | 99.1                 | 99.3                | 99.3                  | 94.5                   | 94.5              | 94.2                 | 94                       | 99                   | 93.9                    |      |
| [MF631845] REV-THC/B2013CU-1 Thailand/chicken/2013       | 97.5                 | 97.6                 | 99.9                      | 99.9                       | 99.9                 | 99.9                  | 99.9                  | 99.9                 | 99.9                          | 99.5               | 99.8                  | 99.8                  | 99.9                 | 99.9               | 99.9                   | 99.9                     | 99.8                    |                                 | 99.7                     | 99.5                         | 99.8                 | 99.9                   | 99.7                 | 99.9                          | 99.7                   | 99.9                 | 99.5                    | 99.9                   | 99.9                | 99.7                 | 99.8                | 99.8                  | 95.1                   | 95.1              | 94.7                 | 94.5                     | 99.5                 | 94.4                    |      |
| [ML138120] cat223ref1 China/Cabots tragopan/2018         | 97.4                 | 97.5                 | 99.8                      | 99.8                       | 99.8                 | 99.8                  | 99.8                  | 99.8                 | 99.8                          | 99.4               | 99.9                  | 99.9                  | 99.9                 | 99.8               | 99.8                   | 99.9                     | 99.7                    | 99.9                            |                          | 99.7                         | 99.5                 | 99.3                   | 99.5                 | 99.1                          | 99.5                   | 99.1                 | 99.5                    | 99                     | 99.5                | 99.5                 | 99.1                | 99.3                  | 99.3                   | 94.5              | 94.4                 | 94.2                     | 99.1                 | 94                      |      |
| [FJ439119] goose/34/10/06 Taiwan/goose/2006              | 97.5                 | 97.5                 | 99.8                      | 99.9                       | 99.9                 | 99.8                  | 99.9                  | 99.9                 | 99.9                          | 99.4               | 99.8                  | 99.8                  | 99.9                 | 99.9               | 99.8                   | 99.8                     | 99.9                    | 99.8                            |                          | 99.8                         | 99.8                 | 99.9                   | 99.7                 | 99.9                          | 99.7                   | 99.9                 | 99.5                    | 99.9                   | 99.9                | 99.7                 | 99.8                | 99.8                  | 95.1                   | 95.1              | 94.7                 | 94.5                     | 99.5                 | 94.4                    |      |
| [KJ909530] SY1209 China/chicken/2012                     | 97.4                 | 97.5                 | 99.8                      | 99.8                       | 99.8                 | 99.8                  | 99.8                  | 99.8                 | 99.8                          | 99.4               | 99.7                  | 99.7                  | 99.8                 | 99.8               | 99.8                   | 99.9                     | 99.7                    | 99.9                            | 99.8                     |                              | 99.8                 | 99.8                   | 99.8                 | 99.8                          | 99.5                   | 99.8                 | 99.3                    | 99.8                   | 99.8                | 99.5                 | 99.7                | 99.7                  | 94.9                   | 94.9              | 94.5                 | 94.4                     | 99.3                 | 94.2                    |      |
| [MW046296] GX19YL1 China/chicken/2019                    | 97.4                 | 97.5                 | 99.8                      | 99.8                       | 99.8                 | 99.8                  | 99.8                  | 99.8                 | 99.8                          | 99.4               | 99.7                  | 99.7                  | 99.8                 | 99.8               | 99.8                   | 99.9                     | 99.7                    | 99.9                            | 99.8                     | 99.8                         |                      | 99.8                   | 99.8                 | 99.7                          | 99.9                   | 99.7                 | 99.5                    | 99.9                   | 99.9                | 99.7                 | 99.8                | 99.8                  | 95.1                   | 95.1              | 94.7                 | 94.5                     | 99.5                 | 94.4                    |      |
| [KF305089] HA1101 China/chicken/2011                     | 97.4                 | 97.5                 | 99.8                      | 99.8                       | 99.8                 | 99.8                  | 99.8                  | 99.8                 | 99.8                          | 99.4               | 99.7                  | 99.7                  | 99.8                 | 99.8               | 99.8                   | 99.9                     | 99.7                    | 99.9                            | 99.8                     | 99.8                         | 99.8                 |                        | 99.8                 | 99.8                          | 99.7                   | 99.9                 | 99.7                    | 99.5                   | 99.9                | 99.9                 | 99.7                | 99.8                  | 99.8                   | 95.1              | 95.1                 | 94.7                     | 94.4                 | 99.1                    | 94   |
| [FJ439120] chicken/3337/05 Taiwan/chicken/2005           | 97.5                 | 97.5                 | 99.8                      | 99.9                       | 99.9                 | 99.8                  | 99.9                  | 99.9                 | 99.9                          | 99.4               | 99.8                  | 99.8                  | 99.9                 | 99.9               | 99.8                   | 99.8                     | 99.9                    | 99.8                            | 99.8                     | 99.8                         | 99.8                 | 99.8                   |                      | 99.7                          | 99.3                   | 99.7                 | 99.1                    | 99.7                   | 99.7                | 99.3                 | 99.5                | 99.5                  | 95.1                   | 95.1              | 94.7                 | 94.4                     | 99.1                 | 94                      |      |
| [MW046295] GX19NNR1 China/chicken/2019                   | 97.3                 | 97.4                 | 99.7                      | 99.7                       | 99.7                 | 99.7                  | 99.7                  | 99.7                 | 99.7                          | 99.3               | 99.6                  | 99.6                  | 99.8                 | 99.7               | 99.7                   | 99.8                     | 99.6                    | 99.8                            | 99.7                     | 99.7                         | 99.7                 | 99.8                   | 99.8                 | 99.7                          | 99.7                   | 99.7                 | 99.7                    | 99.1                   | 99.7                | 99.7                 | 99.3                | 99.5                  | 99.5                   | 94.7              | 94.4                 | 94.2                     | 99.1                 | 94                      |      |
| [KJ909531] CY1111 China/chicken/2011                     | 97.5                 | 97.5                 | 99.8                      | 99.9                       | 99.9                 | 99.8                  | 99.9                  | 99.9                 | 99.9                          | 99.4               | 99.8                  | 99.8                  | 99.9                 | 99.9               | 99.8                   | 99.8                     | 99.9                    | 99.8                            | 99.8                     | 99.8                         | 99.8                 | 99.8                   | 99.8                 | 99.8                          | 99.8                   | 99.8                 | 99.8                    | 99.5                   | 99.9                | 99.9                 | 99.7                | 99.8                  | 99.8                   | 95.1              | 95.1                 | 94.7                     | 94.5                 | 99.5                    | 94.4 |
| [KY581581] HB2015021 China/chicken/2015                  | 97.3                 | 97.3                 | 99.6                      | 99.7                       | 99.7                 | 99.6                  | 99.7                  | 99.7                 | 99.7                          | 99.2               | 99.5                  | 99.5                  | 99.7                 | 99.7               | 99.6                   | 99.7                     | 99.5                    | 99.7                            | 99.6                     | 99.7                         | 99.6                 | 99.7                   | 99.6                 | 99.7                          | 99.6                   | 99.8                 |                         | 99.5                   | 99.5                | 99.1                 | 99.3                | 99.3                  | 94.5                   | 94.5              | 94.2                 | 94                       | 99                   | 93.9                    |      |
| [MW046297] GX18NNR1 China/chicken/2019                   | 97.4                 | 97.5                 | 99.8                      | 99.8                       | 99.8                 | 99.8                  | 99.8                  | 99.8                 | 99.8                          | 99.4               | 99.7                  | 99.7                  | 99.8                 | 99.8               | 99.8                   | 99.9                     | 99.7                    | 99.9                            | 99.8                     | 99.8                         | 99.8                 | 99.8                   | 99.8                 | 99.8                          | 99.8                   | 99.8                 | 99.6                    |                        | 99.9                | 99.7                 | 99.8                | 99.8                  | 95.1                   | 95.1              | 94.7                 | 94.5                     | 99.5                 | 94.4                    |      |
| [JQ804915] 1105 China/muscovy duck/2011                  | 97.5                 | 97.5                 | 99.8                      | 99.9                       | 99.9                 | 99.8                  | 99.9                  | 99.9                 | 99.9                          | 99.4               | 99.8                  | 99.8                  | 99.9                 | 99.9               | 99.8                   | 99.9                     | 99.8                    | 99.9                            | 99.8                     | 99.8                         | 99.8                 | 99.8                   | 99.8                 | 99.8                          | 99.8                   | 99.8                 | 99.8                    | 99.6                   |                     | 99.7                 | 99.8                | 99.8                  | 95.1                   | 95.1              | 94.7                 | 94.5                     | 99.5                 | 94.4                    |      |
| [MW046294] GD20R1 China/chicken/2020                     | 97.4                 | 97.4                 | 99.7                      | 99.8                       | 99.8                 | 99.7                  | 99.8                  | 99.8                 | 99.8                          | 99.3               | 99.7                  | 99.7                  | 99.8                 | 99.8               | 99.7                   | 99.8                     | 99.7                    | 99.8                            | 99.7                     | 99.8                         | 99.7                 | 99.8                   | 99.7                 | 99.8                          | 99.7                   | 99.9                 | 99.7                    | 99.7                   | 99.9                | 99.7                 | 99.8                | 99.8                  | 95.1                   | 94.7              | 94.4                 | 94.2                     | 99.1                 | 94                      |      |
| [AF246698] IL-74/chicken/1972                            | 97.6                 | 97.7                 | 99.9                      | 99.9                       | 99.9                 | 99.9                  | 99.9                  | 99.9                 | 99.9                          | 99.4               | 99.8                  | 99.8                  | 99.9                 | 99.9               | 99.8                   | 99.9                     | 99.8                    | 99.9                            | 99.8                     | 99.8                         | 99.8                 | 99.8                   | 99.8                 | 99.7                          | 99.9                   | 99.7                 | 99.9                    | 99.7                   | 99.8                | 99.9                 | 99.8                |                       | 99.9                   | 95.2              | 95.2                 | 94.9                     | 94.7                 | 99.3                    | 94.5 |
| [OK631657] USP-586 Brazil/chicken/2014                   | 97.5                 | 97.6                 | 99.9                      | 99.9                       | 99.9                 | 99.9                  | 99.8                  | 99.9                 | 99.9                          | 99.4               | 99.7                  | 99.7                  | 99.8                 | 99.                |                        |                          |                         |                                 |                          |                              |                      |                        |                      |                               |                        |                      |                         |                        |                     |                      |                     |                       |                        |                   |                      |                          |                      |                         |      |

<sup>1</sup> Nucleotides comparison are below the diagonal line.

<sup>2</sup> Deduced amino acids comparison are above the diagonal line.

**Table S8.** Polymorphisms in *env* gene motifs of the compared strains of REV.

| MOTIF                    | CONSENSUS SEQUENCE                                 | LOGO                                                                                 | POLYMORPHISM<br>(ACCESSION N°)                                                                                                                |
|--------------------------|----------------------------------------------------|--------------------------------------------------------------------------------------|-----------------------------------------------------------------------------------------------------------------------------------------------|
| Epitope                  | <sup>213</sup> SVQYHPL <sup>219</sup>              |    | Conserved                                                                                                                                     |
|                          | <sup>139</sup> KTYFTAILQKTKLG <sup>152</sup>       |    | Conserved                                                                                                                                     |
|                          | <sup>139</sup> KTYFTAILQKTKLGS <sup>153</sup>      |    | Conserved                                                                                                                                     |
|                          | <sup>139</sup> KTYFTAILQKTKLGSY <sup>154</sup>     |    | Conserved                                                                                                                                     |
|                          | <sup>137</sup> LGKTYFTAILQKTKLG <sup>152</sup>     |    | L137M (MG471384, AY842951)                                                                                                                    |
|                          | <sup>137</sup> LGKTYFTAILQKTKLGSY <sup>154</sup>   |    | L137M (MG471384, AY842951)                                                                                                                    |
| Fusion peptide           | <sup>402</sup> FIPLLVLGITGATLAGGTGL <sup>422</sup> |    | L406P (MG471384, AY842951),<br>T412S (MF185397, DQ003591,<br>KF709431, KF313137, KX278301,<br>A417T (MG471384, AY842951),<br>G421E (KY581581) |
| Immunosuppression domain | <sup>462</sup> LQNRRLDLLTAEQGGI <sup>478</sup>     |  | D469G (MW046295)                                                                                                                              |
| Disulfide bond in SU     | <sup>255</sup> CWLC <sup>258</sup>                 |  | C258S (MZ833509)                                                                                                                              |
| Disulfide bond in TM     | <sup>479</sup> CLALQEKCC <sup>487</sup>            |  | C486R (MW046295)                                                                                                                              |

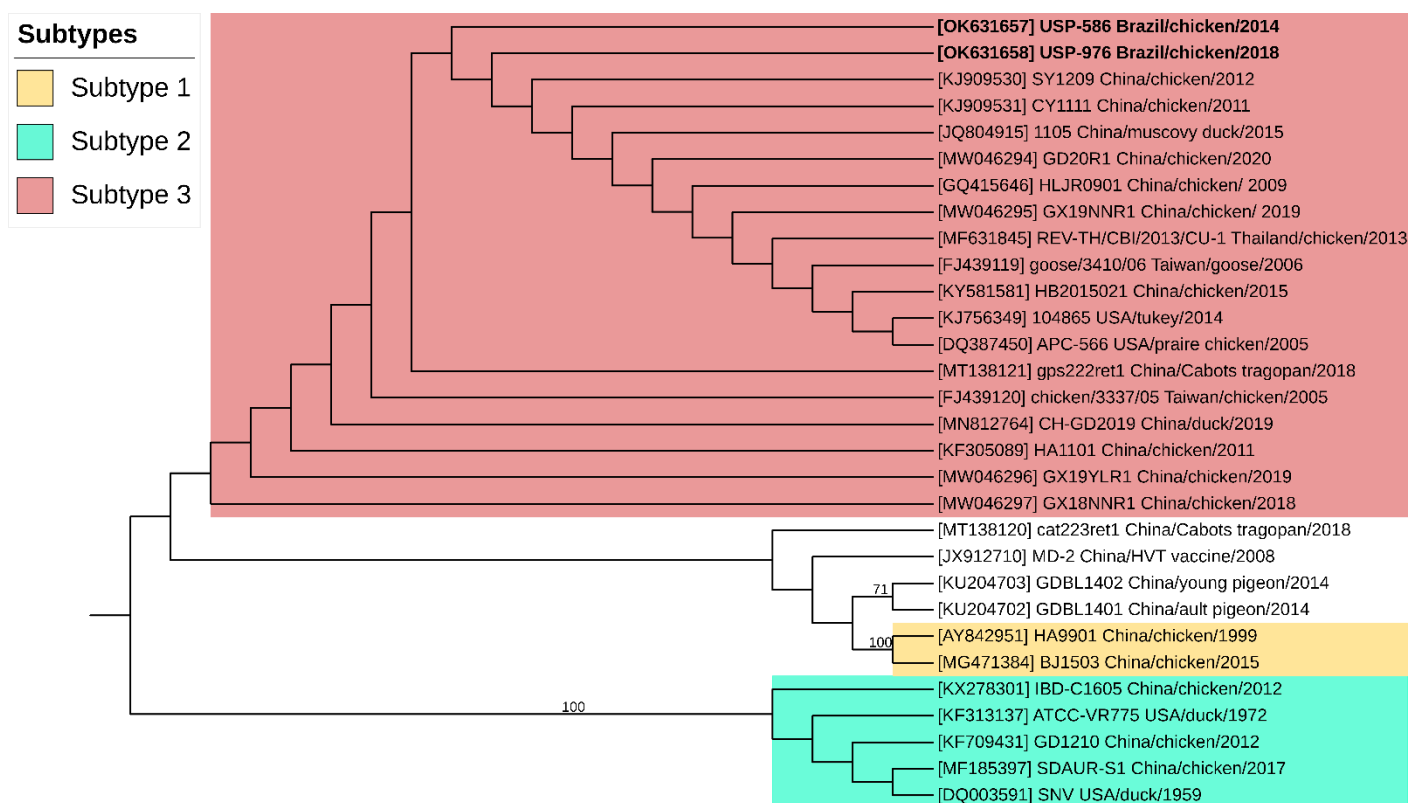

**Figure S1.** Phylogenetic analysis based on REV LTR region. The evolutionary tree inferred with the Maximum Likelihood method with 1000 bootstraps replications. The evolutionary distances were computed using the K80 model.

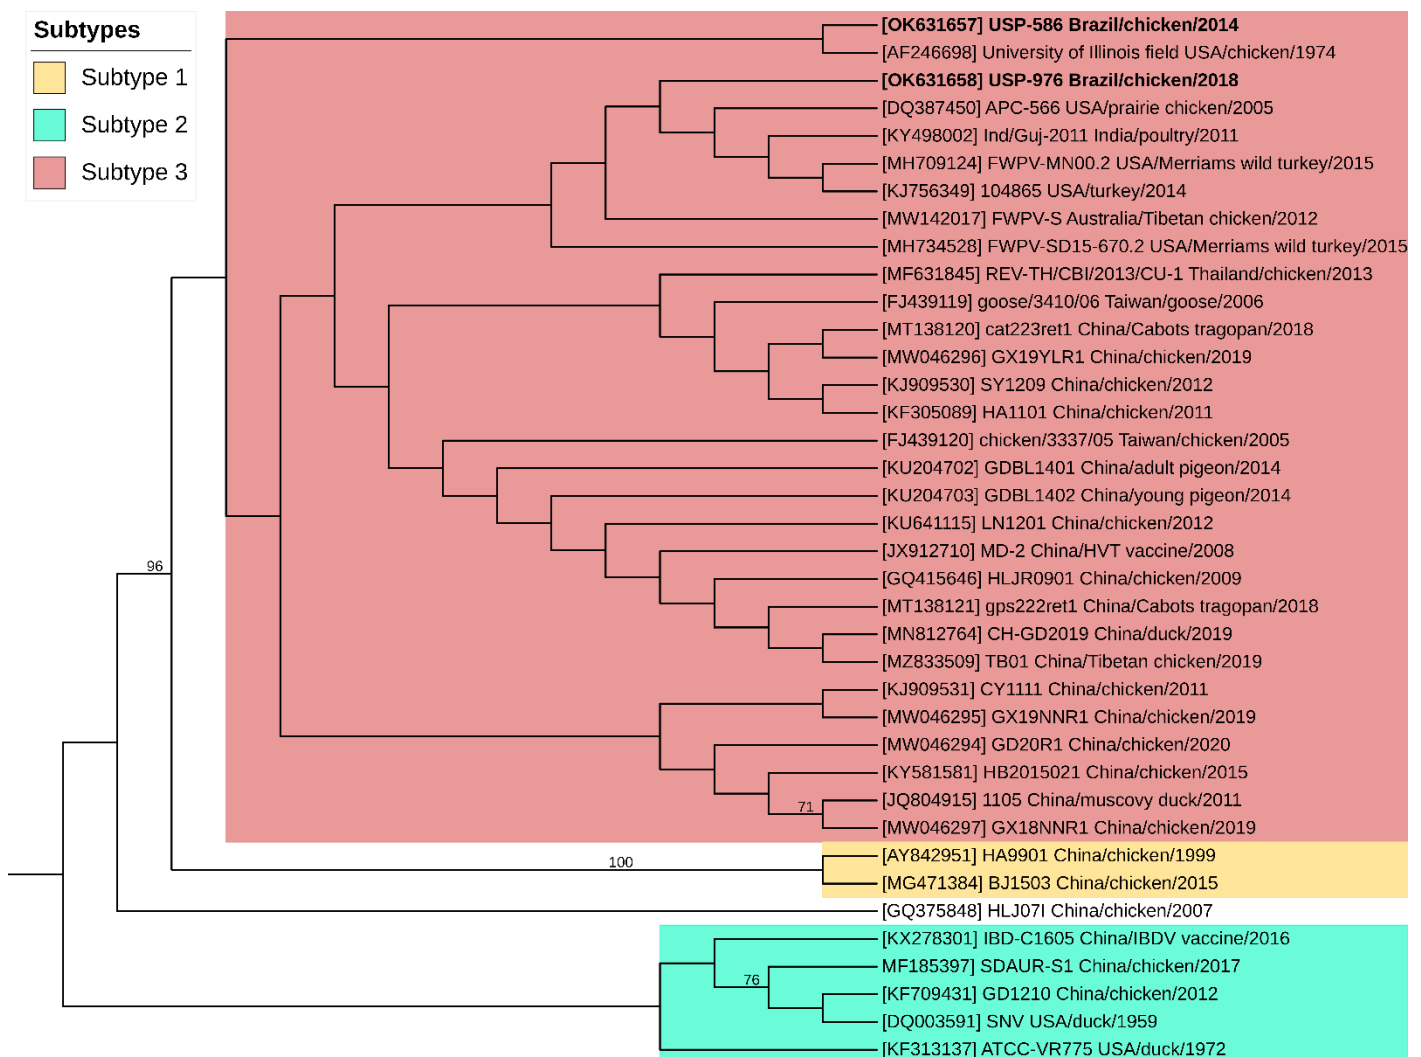

**Figure S2.** Phylogenetic analysis based on REV *gag* gene. The evolutionary tree inferred with the Maximum Likelihood method with 1000 bootstraps replications. The evolutionary distances were computed using the HKY + I model.

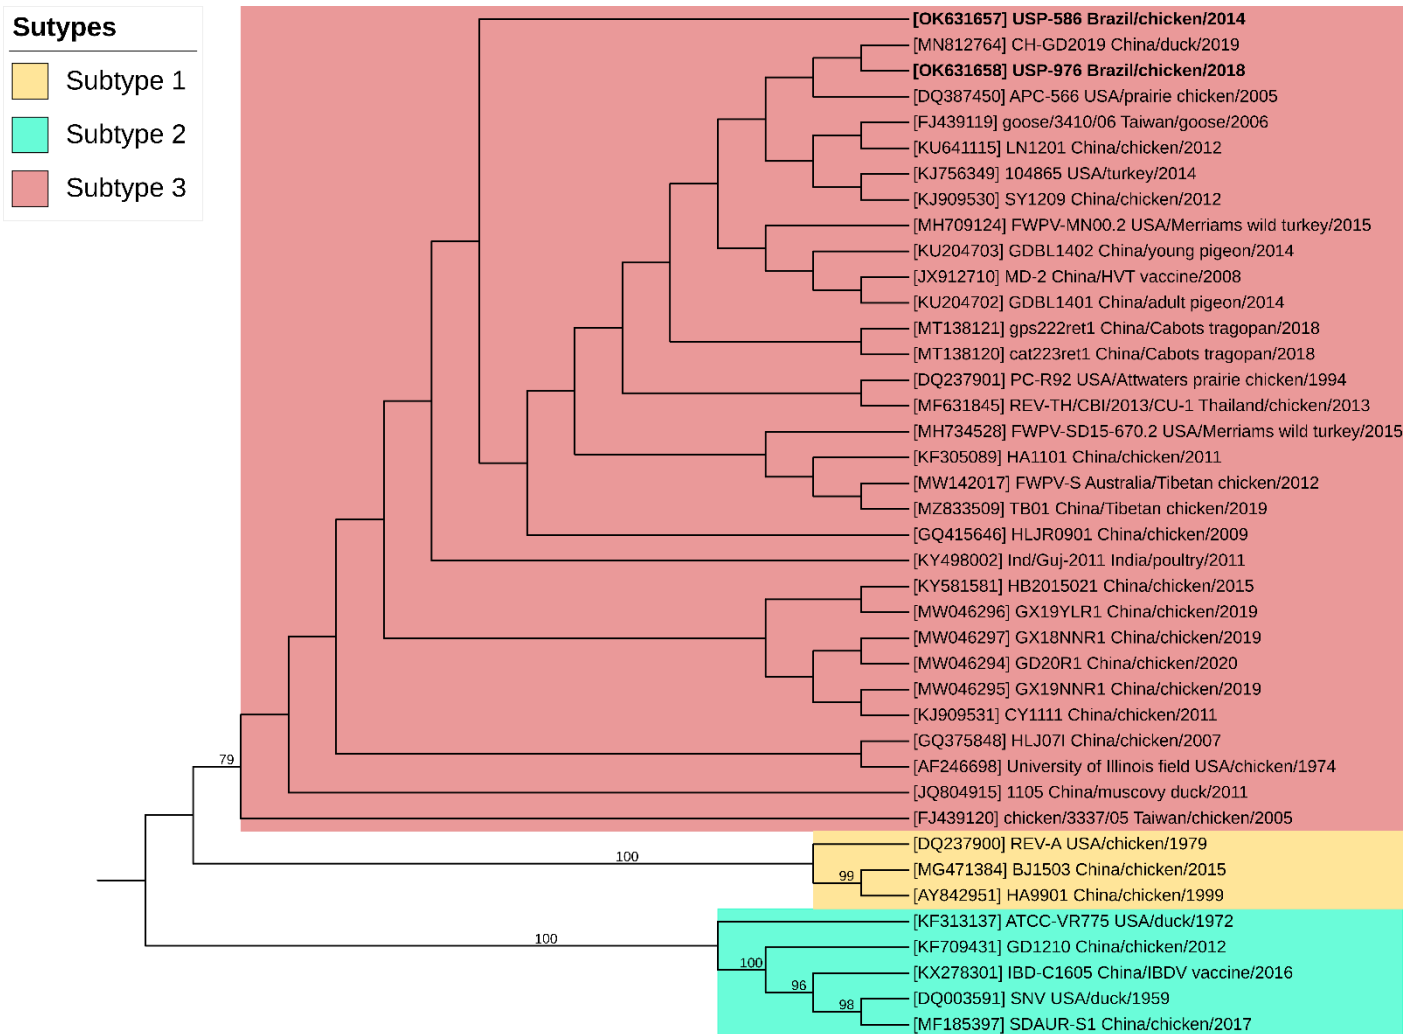

**Figure S3.** Phylogenetic analysis based on REV *pol* gene. The evolutionary tree inferred with the Maximum Likelihood method with 1000 bootstraps replications. The evolutionary distances were computed using the HKY + I model.



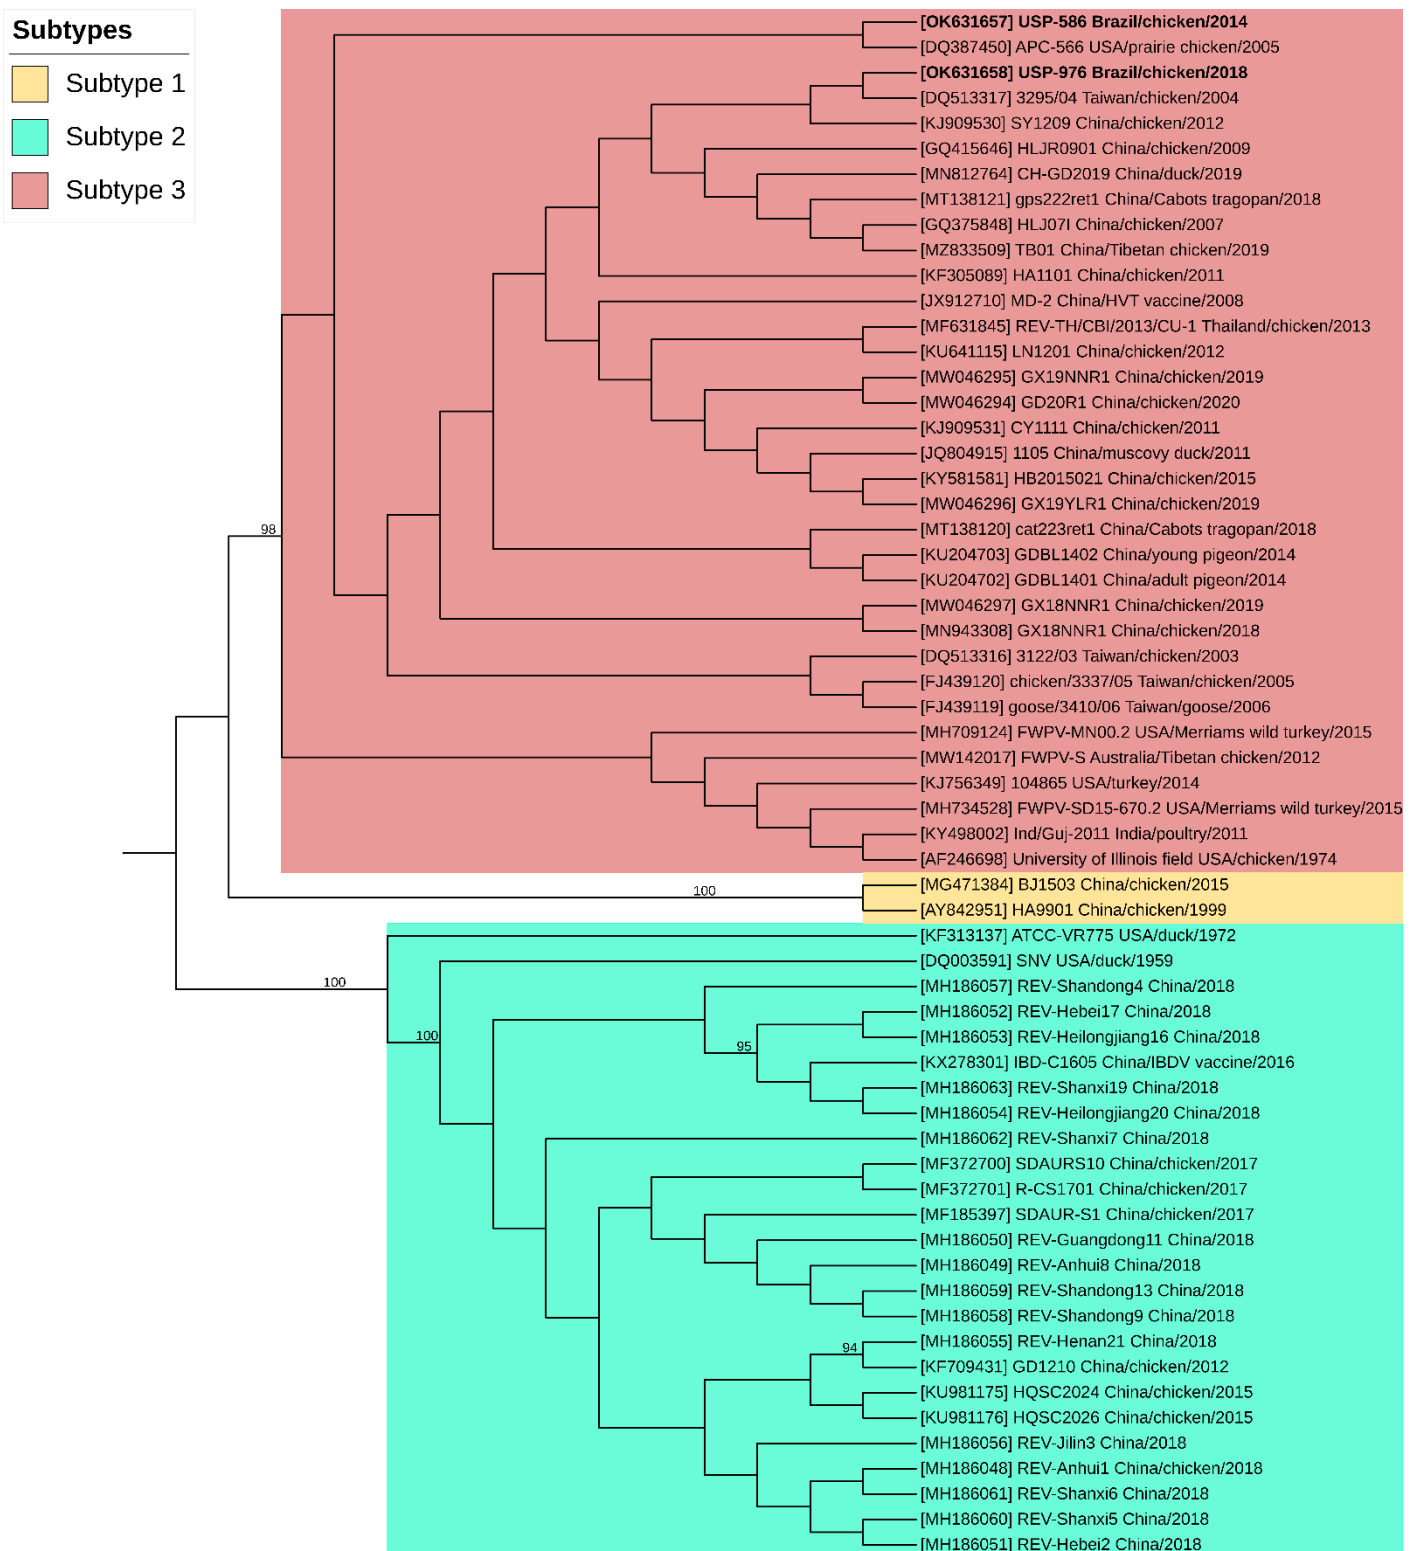

**Figure S4.** Phylogenetic analysis based on REV *env* gene. The evolutionary tree inferred with the Maximum Likelihood method with 1000 bootstraps replications. The evolutionary distances were computed using the HKY model.
